# Supplementary material for: Role of the C-terminal Modules of Klebsiella Phage KP32 Receptor-Binding Protein gp38 in Protein and Phage Functionality
Source: Research Square preprint supplement (doi:10.21203/rs.3.rs-5986232/v1), 2025-04-04
Supplement: Supplementary file 1 [file f4fd002b6593603a5938fb7c.xlsx]

## Sheet: T S1
Table S1. Enzymatic activity of truncated variants and individual domain(s) of RBP2 (KP32gp38) screened on Klebsiella capsular type collection. WT = wild-type; CP = conserved peptide; E = enzymatic domain; LIN = linker between E and CBM; CBM = carbohydrate-binding module; LEC = lectin-like domain. HALO indicates enzymatic activity visible as semitransparent halo zone on bacterial lawn, NO indicat…
Bacterial strain			Truncated variant
K type	Species	Strain	KP32gp38_WT	KP32gp38_ΔLEC	KP32gp38_ΔCP	KP32gp38_ Δ(CP-LEC)	KP32gp38_ΔCBM	KP32gp38_Δ(LIN-CBM)	KP32gp38_ Δ(CBM-LEC)	KP32gp38_ Δ(CP-CBM-LEC)	KP32gp88_ Δ(LIN-CBM-LEC)	KP32gp38_E	KP32gp38_LIN-CBM-LEC	KP32gp38_CBM-LEC	KP32gp38_LIN-CBM	KP32gp38_CBM	KP32gp38_LEC
K1	K. pneumoniae	52.144	NO	NO	NO	NO	nt	nt	NO	NO	NO	NO	nt	NO	nt	NO	NO
K2	K. pneumoniae	52.145	NO	NO	NO	NO	nt	nt	NO	NO	NO	NO	nt	NO	nt	NO	NO
K3	K. pneumoniae	Kp271	NO	NO	NO	NO	NO	NO	NO	NO	NO	NO	NO	NO	NO	NO	NO
K4	K. pneumoniae ozaenae	52.211 T	NO	NO	NO	NO	nt	nt	NO	NO	NO	NO	nt	NO	nt	NO	NO
K5	K. pneumoniae ozaenae	52.212	NO	NO	NO	NO	nt	nt	NO	NO	NO	NO	nt	NO	nt	NO	NO
K6	K. pneumoniae ozaenae	52.213	NO	NO	NO	NO	nt	nt	NO	NO	NO	NO	nt	NO	nt	NO	NO
K7	K. pneumoniae	52.205	NO	NO	NO	NO	nt	nt	NO	NO	NO	NO	nt	NO	nt	NO	NO
K8	K. pneumoniae	52.206	NO	NO	NO	NO	nt	nt	NO	NO	NO	NO	nt	NO	nt	NO	NO
K9	K. pneumoniae	52.207.1	NO	NO	NO	NO	nt	nt	NO	NO	NO	NO	nt	NO	nt	NO	NO
		52.207.2	NO	NO	NO	NO	nt	nt	NO	NO	NO	NO	nt	NO	nt	NO	NO
K10	K. pneumoniae	52.214	NO	NO	NO	NO	nt	nt	NO	NO	NO	NO	nt	NO	nt	NO	NO
K11	K. pneumoniae	52.215	NO	NO	NO	NO	nt	nt	NO	NO	NO	NO	nt	NO	nt	NO	NO
K11	K. pneumoniae	Kp390	NO	NO	NO	NO	NO	NO	NO	NO	NO	NO	NO	NO	NO	NO	NO
K12	K. pneumoniae	52.216	NO	NO	NO	NO	nt	nt	NO	NO	NO	NO	nt	NO	nt	NO	NO
K13	K. pneumoniae	52.217	NO	NO	NO	NO	nt	nt	NO	NO	NO	NO	nt	NO	nt	NO	NO
K14	K. pneumoniae	52.218	NO	NO	NO	NO	nt	nt	NO	NO	NO	NO	nt	NO	nt	NO	NO
K15	K. pneumoniae	52.21	NO	NO	NO	NO	nt	nt	NO	NO	NO	NO	nt	NO	nt	NO	NO
K16	K. pneumoniae	52.22	NO	NO	NO	NO	nt	nt	NO	NO	NO	NO	nt	NO	nt	NO	NO
K17	K. pneumoniae	52.221	NO	NO	NO	NO	nt	nt	NO	NO	NO	NO	nt	NO	nt	NO	NO
K18	K. pneumoniae	52.222	NO	NO	NO	NO	nt	nt	NO	NO	NO	NO	nt	NO	nt	NO	NO
K19	K. pneumoniae	52.223	NO	NO	NO	NO	nt	nt	NO	NO	NO	NO	nt	NO	nt	NO	NO
K20	K. pneumoniae	52.224	NO	NO	NO	NO	nt	nt	NO	NO	NO	NO	nt	NO	nt	NO	NO
K21	K. pneumoniae	52.225	HALO	HALO	HALO	HALO	nt	nt	NO	NO	NO	NO	nt	NO	nt	NO	NO
K21	K. pneumoniae	Kp45	HALO	HALO	HALO	HALO	nt	nt	NO	NO	NO	NO	nt	NO	nt	NO	NO
K21	K. pneumoniae	Kp358	HALO	HALO	HALO	HALO	NO	NO	NO	NO	NO	NO	NO	NO	NO	NO	NO
KL163	K. pneumoniae	Kp968	HALO	HALO	HALO	HALO	NO	NO	NO	NO	NO	NO	NO	NO	NO	NO	NO
K22	K. pneumoniae	52.226	NO	NO	NO	NO	nt	nt	NO	NO	NO	NO	nt	NO	nt	NO	NO
K23	K. pneumoniae	52.228	NO	NO	NO	NO	nt	nt	NO	NO	NO	NO	nt	NO	nt	NO	NO
K24	K. pneumoniae	52.229	NO	NO	NO	NO	nt	nt	NO	NO	NO	NO	nt	NO	nt	NO	NO
K25	Raoultella planticola	52.23	NO	NO	NO	NO	nt	nt	NO	NO	NO	NO	nt	NO	nt	NO	NO
K26	K. pneumoniae	CIP 53.6	NO	NO	NO	NO	nt	nt	NO	NO	NO	NO	nt	NO	nt	NO	NO
K27	K. pneumoniae	CIP 52.232	NO	NO	NO	NO	nt	nt	NO	NO	NO	NO	nt	NO	nt	NO	NO
K28	K. pneumoniae	CIP 52.233	NO	NO	NO	NO	nt	nt	NO	NO	NO	NO	nt	NO	nt	NO	NO
K29	K. pneumoniae	CIP 52.234	NO	NO	NO	NO	nt	nt	NO	NO	NO	NO	nt	NO	nt	NO	NO
K30	K. pneumoniae	CIP 52.235	NO	NO	NO	NO	nt	nt	NO	NO	NO	NO	nt	NO	nt	NO	NO
K31	K. pneumoniae	CIP 52.231	NO	NO	NO	NO	NO	NO	NO	NO	NO	NO	NO	NO	NO	NO	NO
K32	K. pneumoniae	CIP 53.7	NO	NO	NO	NO	nt	nt	NO	NO	NO	NO	nt	NO	nt	NO	NO
K33	K. pneumoniae	CIP 53.8	NO	NO	NO	NO	nt	nt	NO	NO	NO	NO	nt	NO	nt	NO	NO
K34	K. pneumoniae	CIP 53.9	NO	NO	NO	NO	nt	nt	NO	NO	NO	NO	nt	NO	nt	NO	NO
K35	K. pneumoniae	CIP 53.10	NO	NO	NO	NO	nt	nt	NO	NO	NO	NO	nt	NO	nt	NO	NO
K36	K. pneumoniae	CIP 53.11	NO	NO	NO	NO	nt	nt	NO	NO	NO	NO	nt	NO	nt	NO	NO
K37	K. pneumoniae	CIP 53.12	NO	NO	NO	NO	nt	nt	NO	NO	NO	NO	nt	NO	nt	NO	NO
K38	K. pneumoniae	CIP 53.13	NO	NO	NO	NO	nt	nt	NO	NO	NO	NO	nt	NO	nt	NO	NO
K39	K. pneumoniae	CIP 53.14.1	NO	NO	NO	NO	nt	nt	NO	NO	NO	NO	nt	NO	nt	NO	NO
		CIP 53.14.2	NO	NO	NO	NO	nt	nt	NO	NO	NO	NO	nt	NO	nt	NO	NO
		CIP 53.14.3	NO	NO	NO	NO	nt	nt	NO	NO	NO	NO	nt	NO	nt	NO	NO
K40	K. pneumoniae	CIP 53.15	NO	NO	NO	NO	nt	nt	NO	NO	NO	NO	nt	NO	nt	NO	NO
K41	K. pneumoniae	CIP 53.16	NO	NO	NO	NO	nt	nt	NO	NO	NO	NO	nt	NO	nt	NO	NO
K42	K. pneumoniae	CIP 53.17	NO	NO	NO	NO	nt	nt	NO	NO	NO	NO	nt	NO	nt	NO	NO
K43	K. pneumoniae	CIP 53.19	NO	NO	NO	NO	nt	nt	NO	NO	NO	NO	nt	NO	nt	NO	NO
K44	K. pneumoniae	CIP 53.20	NO	NO	NO	NO	nt	nt	NO	NO	NO	NO	nt	NO	nt	NO	NO
K45	K. pneumoniae	CIP 53.21	NO	NO	NO	NO	nt	nt	NO	NO	NO	NO	nt	NO	nt	NO	NO
K46	K. pneumoniae	CIP 53.22	NO	NO	NO	NO	nt	nt	NO	NO	NO	NO	nt	NO	nt	NO	NO
K47	K. pneumoniae	CIP 53.23	NO	NO	NO	NO	nt	nt	NO	NO	NO	NO	nt	NO	nt	NO	NO
K48	K. pneumoniae	CIP 53.24	NO	NO	NO	NO	nt	nt	NO	NO	NO	NO	nt	NO	nt	NO	NO
K49	K. pneumoniae	CIP 52.199	NO	NO	NO	NO	nt	nt	NO	NO	NO	NO	nt	NO	nt	NO	NO
K50	K. pneumoniae	CIP 52.200	NO	NO	NO	NO	nt	nt	NO	NO	NO	NO	nt	NO	nt	NO	NO
K51	K. pneumoniae	CIP 52.201	NO	NO	NO	NO	nt	nt	NO	NO	NO	NO	nt	NO	nt	NO	NO
K52	K. pneumoniae	CIP 53.25	NO	NO	NO	NO	nt	nt	NO	NO	NO	NO	nt	NO	nt	NO	NO
K53	K. pneumoniae	CIP 53.26	NO	NO	NO	NO	nt	nt	NO	NO	NO	NO	nt	NO	nt	NO	NO
K54	K. pneumoniae	CIP 53.27	NO	NO	NO	NO	nt	nt	NO	NO	NO	NO	nt	NO	nt	NO	NO
K55	K. pneumoniae	NCTC 9175	NO	NO	NO	NO	nt	nt	NO	NO	NO	NO	nt	NO	nt	NO	NO
K56	K. pneumoniae	NCTC 9176	NO	NO	NO	NO	nt	nt	NO	NO	NO	NO	nt	NO	nt	NO	NO
K57	K. pneumoniae	NCTC 9177	NO	NO	NO	NO	nt	nt	NO	NO	NO	NO	nt	NO	nt	NO	NO
K58	K. pneumoniae	NCTC 9178.1	NO	NO	NO	NO	nt	nt	NO	NO	NO	NO	nt	NO	nt	NO	NO
		NCTC 9178.2	NO	NO	NO	NO	nt	nt	NO	NO	NO	NO	nt	NO	nt	NO	NO
K59	Raoultella planticola	NCTC 9179	NO	NO	NO	NO	nt	nt	NO	NO	NO	NO	nt	NO	nt	NO	NO
K60	K. pneumoniae	NCTC 9180	NO	NO	NO	NO	nt	nt	NO	NO	NO	NO	nt	NO	nt	NO	NO
K61	K. pneumoniae	NCTC 9181.1	NO	NO	NO	NO	nt	nt	NO	NO	NO	NO	nt	NO	nt	NO	NO
		NCTC 9181.2	NO	NO	NO	NO	nt	nt	NO	NO	NO	NO	nt	NO	nt	NO	NO
K61	K. pneumoniae	CIP 108293.1	NO	NO	NO	NO	nt	nt	NO	NO	NO	NO	nt	NO	nt	NO	NO
		CIP 108283.2	NO	NO	NO	NO	nt	nt	NO	NO	NO	NO	nt	NO	nt	NO	NO
K62	K. pneumoniae	NCTC 9182	NO	NO	NO	NO	nt	nt	NO	NO	NO	NO	nt	NO	nt	NO	NO
K63	K. pneumoniae	NCTC 9183.1	NO	NO	NO	NO	nt	nt	NO	NO	NO	NO	nt	NO	nt	NO	NO
		NCTC 9183.2	NO	NO	NO	NO	nt	nt	NO	NO	NO	NO	nt	NO	nt	NO	NO
K63	K. pneumoniae	Kp77	NO	NO	NO	NO	NO	NO	NO	NO	NO	NO	NO	NO	NO	NO	NO
K63	K. pneumoniae	Kp486	NO	NO	NO	NO	NO	NO	NO	NO	NO	NO	NO	NO	NO	NO	NO
K64	K. pneumoniae	NCTC 9184	NO	NO	NO	NO	nt	nt	NO	NO	NO	NO	nt	NO	nt	NO	NO
		CIP 80.47	NO	NO	NO	NO	nt	nt	NO	NO	NO	NO	nt	NO	nt	NO	NO
K65	Raoutella terrigena	NCTC 9185	NO	NO	NO	NO	nt	nt	NO	NO	NO	NO	nt	NO	nt	NO	NO
K66	K. oxytoca	NCTC 9186	NO	NO	NO	NO	nt	nt	NO	NO	NO	NO	nt	NO	nt	NO	NO
K67	Klebsiella sp.	NCTC 9187	NO	NO	NO	NO	nt	nt	NO	NO	NO	NO	nt	NO	nt	NO	NO
K68	Klebsiella sp.	NCTC 9188	NO	NO	NO	NO	nt	nt	NO	NO	NO	NO	nt	NO	nt	NO	NO
K69	Klebsiella sp.	NCTC 9189	NO	NO	NO	NO	nt	nt	NO	NO	NO	NO	nt	NO	nt	NO	NO
K70	K. oxytoca	NCTC 10261	NO	NO	NO	NO	nt	nt	NO	NO	NO	NO	nt	NO	nt	NO	NO
K71	K. pneumoniae	NCTC 10262	NO	NO	NO	NO	nt	nt	NO	NO	NO	NO	nt	NO	nt	NO	NO
K72	Raoutella planticola	NCTC 10263	NO	NO	NO	NO	nt	nt	NO	NO	NO	NO	nt	NO	nt	NO	NO
K74	K. oxytoca	NCTC 11355	NO	NO	NO	NO	nt	nt	NO	NO	NO	NO	nt	NO	nt	NO	NO
K79	K. oxytoca	NCTC 11356	NO	NO	NO	NO	nt	nt	NO	NO	NO	NO	nt	NO	nt	NO	NO
K80	K. pneumoniae	NCTC 11357	NO	NO	NO	NO	nt	nt	NO	NO	NO	NO	nt	NO	nt	NO	NO
K81	K. pneumoniae	NCTC 11358	NO	NO	NO	NO	nt	nt	NO	NO	NO	NO	nt	NO	nt	NO	NO
K82	K. pneumoniae	NCTC 11359	NO	NO	NO	NO	nt	nt	NO	NO	NO	NO	nt	NO	nt	NO	NO

## Sheet: T S2
Table S2. Enzymatic activity of chimeric variants obtained by the fusion of KP32gp38 C-terminal domains with other RBPs with depolymerase activity. LIN = linker between enzymatic domain and CBM; CBM = carbohydrate-binding module; LEC = lectin-like domain. The colour scheme and abbreviations correspond to the models presented in Figure 2.
	Scheme	Name	Original RBP at N-terminus	Domain(s) at C-terminus	Specificity of original RBP	Specificity of chimera
		KP34gp57_ KP32gp38_CBM	KP34gp57	KP32gp38_CBM	K63	K63
		K11gp17_ KP32gp38_CBM	K11gp17		K11	K11
		K11gp0043_ KP32gp38_CBM	K11gp0043		K31	K31
		KP36gp50_ KP32gp38_CBM	KP36gp50		K63	K63
		KP32gp37_ KP32gp38_CBM	KP32gp37		K3	K3
		KP34gp57_ KP32gp38_CBM-LEC	KP34gp57	KP32gp38_CBM-LEC	K63	K63
		K11gp17_ KP32gp38_CBM-LEC	K11gp17		K11	K11
		K11gp0043_ KP32gp38_CBM-LEC	K11gp0043		K31	K31
		KP36gp50_ KP32gp38_CBM-LEC	KP36gp50		K63	K63
		KP32gp37_ KP32gp38_CBM-LEC	KP32gp37		K3	K3
		KP34gp57_ KP32gp38_LIN-CBM	KP34gp57	KP32gp38_LIN-CBM	K63	K63
		K11gp17_ KP32gp38_LIN-CBM	K11gp17		K11	K11
		K11gp0043_ KP32gp38_LIN-CBM	K11gp0043		K31	K31
		KP36gp50_ KP32gp38_LIN-CBM	KP36gp50		K63	K63
		KP32gp37_ KP32gp38_LIN-CBM	KP32gp37		K3	K3
		KP34gp57_ KP32gp38_LIN-CBM-LEC	KP34gp57	KP32gp38_LIN-CBM-LEC	K63	K63
		K11gp17_ KP32gp38_LIN-CBM-LEC	K11gp17		K11	K11
		K11gp0043_ KP32gp38_LIN-CBM-LEC	K11gp0043		K31	K31
		KP36gp50_ KP32gp38_LIN-CBM-LEC	KP36gp50		K63	K63
		KP32gp37_ KP32gp38_LIN-CBM-LEC	KP32gp37		K3	K3
		KP34gp57_ KP32gp38_LEC	KP34gp57	KP32gp38_LEC	K63	K63
		K11gp17_ KP32gp38_LEC	K11gp17		K11	K11
		K11gp0043_ KP32gp38_LEC	K11gp0043		K31	K31
		KP36gp50_ KP32gp38_LEC	KP36gp50		K63	K63
		KP32gp37_ KP32gp38_LEC	KP32gp37		K3	K3

## Sheet: T S3 
Table S3. Enzymatic activity of chimeric variants obtained by the fusion of KP32gp38 C-terminal domains with other RBPs with depolymerase activity screened on Klebsiella capsular type collection. HALO indicates enzymatic activity visible as semitransparent halo zone on bacterial lawn, NO indicates the absence of any observed activity on this strain. Colours represent particular capsular type spec…
Bacterial strain			Chimeric variants																									WT proteins
K type	Species	Strain	KP34gp57_ KP32gp38_CBM	K11gp17_ KP32gp38_CBM	K11gp0043_ KP32gp38_CBM	KP36gp50_ KP32gp38_CBM	KP32gp37_ KP32gp38_CBM	KP34gp57_ KP32gp38_CBM-LEC	K11gp17_ KP32gp38_CBM-LEC	K11gp0043_ KP32gp38_CBM-LEC	KP36gp50_ KP32gp38_CBM-LEC	KP32gp37_ KP32gp38_CBM-LEC	KP34gp57_ KP32gp38_LIN-CBM	K11gp17_ KP32gp38_LIN-CBM	K11gp0043_ KP32gp38_LIN-CBM	KP36gp50_ KP32gp38_LIN-CBM	KP32gp37_ KP32gp38_LIN-CBM	KP34gp57_ KP32gp38_LIN-CBM-LEC	K11gp17_ KP32gp38_LIN-CBM-LEC	K11gp0043_ KP32gp38_LIN-CBM-LEC	KP36gp50_ KP32gp38_LIN-CBM-LEC	KP32gp37_ KP32gp38_LIN-CBM-LEC	KP34gp57_ KP32gp38_LEC	K11gp17_ KP32gp38_LEC	K11gp0043_ KP32gp38_LEC	KP36gp50_ KP32gp38_LEC	KP32gp37_ KP32gp38_LEC	KP34gp57	K11gp17	K11gp0043	KP36gp50	KP32gp37
K1	K. pneumoniae	52.144	NO	NO	NO	NO	NO	NO	NO	NO	NO	NO	NO	NO	NO	NO	NO	NO	NO	NO	NO	NO	NO	NO	NO	NO	NO	NO	NO	NO	NO	NO
K2	K. pneumoniae	52.145	NO	NO	NO	NO	NO	NO	NO	NO	NO	NO	NO	NO	NO	NO	NO	NO	NO	NO	NO	NO	NO	NO	NO	NO	NO	NO	NO	NO	NO	NO
K3	K. pneumoniae	Kp271	NO	NO	NO	NO	HALO	NO	NO	NO	NO	HALO	NO	NO	NO	NO	HALO	NO	NO	NO	NO	HALO	NO	NO	NO	NO	HALO	NO	NO	NO	NO	HALO
K4	K. pneumoniae ozaenae	52.211 T	NO	NO	NO	NO	NO	NO	NO	NO	NO	NO	NO	NO	NO	NO	NO	NO	NO	NO	NO	NO	NO	NO	NO	NO	NO	NO	NO	NO	NO	NO
K5	K. pneumoniae ozaenae	52.212	NO	NO	NO	NO	NO	NO	NO	NO	NO	NO	NO	NO	NO	NO	NO	NO	NO	NO	NO	NO	NO	NO	NO	NO	NO	NO	NO	NO	NO	NO
K6	K. pneumoniae ozaenae	52.213	NO	NO	NO	NO	NO	NO	NO	NO	NO	NO	NO	NO	NO	NO	NO	NO	NO	NO	NO	NO	NO	NO	NO	NO	NO	NO	NO	NO	NO	NO
K7	K. pneumoniae	52.205	NO	NO	NO	NO	NO	NO	NO	NO	NO	NO	NO	NO	NO	NO	NO	NO	NO	NO	NO	NO	NO	NO	NO	NO	NO	NO	NO	NO	NO	NO
K8	K. pneumoniae	52.206	NO	NO	NO	NO	NO	NO	NO	NO	NO	NO	NO	NO	NO	NO	NO	NO	NO	NO	NO	NO	NO	NO	NO	NO	NO	NO	NO	NO	NO	NO
K9	K. pneumoniae	52.207.1	NO	NO	NO	NO	NO	NO	NO	NO	NO	NO	NO	NO	NO	NO	NO	NO	NO	NO	NO	NO	NO	NO	NO	NO	NO	NO	NO	NO	NO	NO
		52.207.2	NO	NO	NO	NO	NO	NO	NO	NO	NO	NO	NO	NO	NO	NO	NO	NO	NO	NO	NO	NO	NO	NO	NO	NO	NO	NO	NO	NO	NO	NO
K10	K. pneumoniae	52.214	NO	NO	NO	NO	NO	NO	NO	NO	NO	NO	NO	NO	NO	NO	NO	NO	NO	NO	NO	NO	NO	NO	NO	NO	NO	NO	NO	NO	NO	NO
K11	K. pneumoniae	52.215	NO	HALO	NO	NO	NO	NO	HALO	NO	NO	NO	NO	HALO	NO	NO	NO	NO	HALO	NO	NO	NO	NO	HALO	NO	NO	NO	NO	HALO	NO	NO	NO
K11	K. pneumoniae	Kp390	NO	HALO	NO	NO	NO	NO	HALO	NO	NO	NO	NO	HALO	NO	NO	NO	NO	HALO	NO	NO	NO	NO	HALO	NO	NO	NO	NO	HALO	NO	NO	NO
K12	K. pneumoniae	52.216	NO	NO	NO	NO	NO	NO	NO	NO	NO	NO	NO	NO	NO	NO	NO	NO	NO	NO	NO	NO	NO	NO	NO	NO	NO	NO	NO	NO	NO	NO
K13	K. pneumoniae	52.217	NO	NO	NO	NO	NO	NO	NO	NO	NO	NO	NO	NO	NO	NO	NO	NO	NO	NO	NO	NO	NO	NO	NO	NO	NO	NO	NO	NO	NO	NO
K14	K. pneumoniae	52.218	NO	NO	NO	NO	NO	NO	NO	NO	NO	NO	NO	NO	NO	NO	NO	NO	NO	NO	NO	NO	NO	NO	NO	NO	NO	NO	NO	NO	NO	NO
K15	K. pneumoniae	52.21	NO	NO	NO	NO	NO	NO	NO	NO	NO	NO	NO	NO	NO	NO	NO	NO	NO	NO	NO	NO	NO	NO	NO	NO	NO	NO	NO	NO	NO	NO
K16	K. pneumoniae	52.22	NO	NO	NO	NO	NO	NO	NO	NO	NO	NO	NO	NO	NO	NO	NO	NO	NO	NO	NO	NO	NO	NO	NO	NO	NO	NO	NO	NO	NO	NO
K17	K. pneumoniae	52.221	NO	NO	NO	NO	NO	NO	NO	NO	NO	NO	NO	NO	NO	NO	NO	NO	NO	NO	NO	NO	NO	NO	NO	NO	NO	NO	NO	NO	NO	NO
K18	K. pneumoniae	52.222	NO	NO	NO	NO	NO	NO	NO	NO	NO	NO	NO	NO	NO	NO	NO	NO	NO	NO	NO	NO	NO	NO	NO	NO	NO	NO	NO	NO	NO	NO
K19	K. pneumoniae	52.223	NO	NO	NO	NO	NO	NO	NO	NO	NO	NO	NO	NO	NO	NO	NO	NO	NO	NO	NO	NO	NO	NO	NO	NO	NO	NO	NO	NO	NO	NO
K20	K. pneumoniae	52.224	NO	NO	NO	NO	NO	NO	NO	NO	NO	NO	NO	NO	NO	NO	NO	NO	NO	NO	NO	NO	NO	NO	NO	NO	NO	NO	NO	NO	NO	NO
K21	K. pneumoniae	52.225	NO	NO	NO	NO	NO	NO	NO	NO	NO	NO	NO	NO	NO	NO	NO	NO	NO	NO	NO	NO	NO	NO	NO	NO	NO	NO	NO	NO	NO	NO
K21	K. pneumoniae	Kp45	NO	NO	NO	NO	NO	NO	NO	NO	NO	NO	NO	NO	NO	NO	NO	NO	NO	NO	NO	NO	NO	NO	NO	NO	NO	NO	NO	NO	NO	NO
K21	K. pneumoniae	Kp358	NO	NO	NO	NO	NO	NO	NO	NO	NO	NO	NO	NO	NO	NO	NO	NO	NO	NO	NO	NO	NO	NO	NO	NO	NO	NO	NO	NO	NO	NO
KL163	K. pneumoniae	Kp968	NO	NO	NO	NO	NO	NO	NO	NO	NO	NO	NO	NO	NO	NO	NO	NO	NO	NO	NO	NO	NO	NO	NO	NO	NO	NO	NO	NO	NO	NO
K22	K. pneumoniae	52.226	NO	NO	NO	NO	NO	NO	NO	NO	NO	NO	NO	NO	NO	NO	NO	NO	NO	NO	NO	NO	NO	NO	NO	NO	NO	NO	NO	NO	NO	NO
K23	K. pneumoniae	52.228	NO	NO	NO	NO	NO	NO	NO	NO	NO	NO	NO	NO	NO	NO	NO	NO	NO	NO	NO	NO	NO	NO	NO	NO	NO	NO	NO	NO	NO	NO
K24	K. pneumoniae	52.229	NO	NO	NO	NO	NO	NO	NO	NO	NO	NO	NO	NO	NO	NO	NO	NO	NO	NO	NO	NO	NO	NO	NO	NO	NO	NO	NO	NO	NO	NO
K25	Raoultella planticola	52.23	NO	NO	NO	NO	NO	NO	NO	NO	NO	NO	NO	NO	NO	NO	NO	NO	NO	NO	NO	NO	NO	NO	NO	NO	NO	NO	NO	NO	NO	NO
K26	K. pneumoniae	CIP 53.6	NO	NO	NO	NO	NO	NO	NO	NO	NO	NO	NO	NO	NO	NO	NO	NO	NO	NO	NO	NO	NO	NO	NO	NO	NO	NO	NO	NO	NO	NO
K27	K. pneumoniae	CIP 52.232	NO	NO	NO	NO	NO	NO	NO	NO	NO	NO	NO	NO	NO	NO	NO	NO	NO	NO	NO	NO	NO	NO	NO	NO	NO	NO	NO	NO	NO	NO
K28	K. pneumoniae	CIP 52.233	NO	NO	NO	NO	NO	NO	NO	NO	NO	NO	NO	NO	NO	NO	NO	NO	NO	NO	NO	NO	NO	NO	NO	NO	NO	NO	NO	NO	NO	NO
K29	K. pneumoniae	CIP 52.234	NO	NO	NO	NO	NO	NO	NO	NO	NO	NO	NO	NO	NO	NO	NO	NO	NO	NO	NO	NO	NO	NO	NO	NO	NO	NO	NO	NO	NO	NO
K30	K. pneumoniae	CIP 52.235	NO	NO	NO	NO	NO	NO	NO	NO	NO	NO	NO	NO	NO	NO	NO	NO	NO	NO	NO	NO	NO	NO	NO	NO	NO	NO	NO	NO	NO	NO
K31	K. pneumoniae	CIP 52.231	NO	NO	HALO	NO	NO	NO	NO	HALO	NO	NO	NO	NO	HALO	NO	NO	NO	NO	HALO	NO	NO	NO	NO	HALO	NO	NO	NO	NO	HALO	NO	NO
K32	K. pneumoniae	CIP 53.7	NO	NO	NO	NO	NO	NO	NO	NO	NO	NO	NO	NO	NO	NO	NO	NO	NO	NO	NO	NO	NO	NO	NO	NO	NO	NO	NO	NO	NO	NO
K33	K. pneumoniae	CIP 53.8	NO	NO	NO	NO	NO	NO	NO	NO	NO	NO	NO	NO	NO	NO	NO	NO	NO	NO	NO	NO	NO	NO	NO	NO	NO	NO	NO	NO	NO	NO
K34	K. pneumoniae	CIP 53.9	NO	NO	NO	NO	NO	NO	NO	NO	NO	NO	NO	NO	NO	NO	NO	NO	NO	NO	NO	NO	NO	NO	NO	NO	NO	NO	NO	NO	NO	NO
K35	K. pneumoniae	CIP 53.10	NO	NO	NO	NO	NO	NO	NO	NO	NO	NO	NO	NO	NO	NO	NO	NO	NO	NO	NO	NO	NO	NO	NO	NO	NO	NO	NO	NO	NO	NO
K36	K. pneumoniae	CIP 53.11	NO	NO	NO	NO	NO	NO	NO	NO	NO	NO	NO	NO	NO	NO	NO	NO	NO	NO	NO	NO	NO	NO	NO	NO	NO	NO	NO	NO	NO	NO
K37	K. pneumoniae	CIP 53.12	NO	NO	NO	NO	NO	NO	NO	NO	NO	NO	NO	NO	NO	NO	NO	NO	NO	NO	NO	NO	NO	NO	NO	NO	NO	NO	NO	NO	NO	NO
K38	K. pneumoniae	CIP 53.13	NO	NO	NO	NO	NO	NO	NO	NO	NO	NO	NO	NO	NO	NO	NO	NO	NO	NO	NO	NO	NO	NO	NO	NO	NO	NO	NO	NO	NO	NO
K39	K. pneumoniae	CIP 53.14.1	NO	NO	NO	NO	NO	NO	NO	NO	NO	NO	NO	NO	NO	NO	NO	NO	NO	NO	NO	NO	NO	NO	NO	NO	NO	NO	NO	NO	NO	NO
		CIP 53.14.2	NO	NO	NO	NO	NO	NO	NO	NO	NO	NO	NO	NO	NO	NO	NO	NO	NO	NO	NO	NO	NO	NO	NO	NO	NO	NO	NO	NO	NO	NO
		CIP 53.14.3	NO	NO	NO	NO	NO	NO	NO	NO	NO	NO	NO	NO	NO	NO	NO	NO	NO	NO	NO	NO	NO	NO	NO	NO	NO	NO	NO	NO	NO	NO
K40	K. pneumoniae	CIP 53.15	NO	NO	NO	NO	NO	NO	NO	NO	NO	NO	NO	NO	NO	NO	NO	NO	NO	NO	NO	NO	NO	NO	NO	NO	NO	NO	NO	NO	NO	NO
K41	K. pneumoniae	CIP 53.16	NO	NO	NO	NO	NO	NO	NO	NO	NO	NO	NO	NO	NO	NO	NO	NO	NO	NO	NO	NO	NO	NO	NO	NO	NO	NO	NO	NO	NO	NO
K42	K. pneumoniae	CIP 53.17	NO	NO	NO	NO	NO	NO	NO	NO	NO	NO	NO	NO	NO	NO	NO	NO	NO	NO	NO	NO	NO	NO	NO	NO	NO	NO	NO	NO	NO	NO
K43	K. pneumoniae	CIP 53.19	NO	NO	NO	NO	NO	NO	NO	NO	NO	NO	NO	NO	NO	NO	NO	NO	NO	NO	NO	NO	NO	NO	NO	NO	NO	NO	NO	NO	NO	NO
K44	K. pneumoniae	CIP 53.20	NO	NO	NO	NO	NO	NO	NO	NO	NO	NO	NO	NO	NO	NO	NO	NO	NO	NO	NO	NO	NO	NO	NO	NO	NO	NO	NO	NO	NO	NO
K45	K. pneumoniae	CIP 53.21	NO	NO	NO	NO	NO	NO	NO	NO	NO	NO	NO	NO	NO	NO	NO	NO	NO	NO	NO	NO	NO	NO	NO	NO	NO	NO	NO	NO	NO	NO
K46	K. pneumoniae	CIP 53.22	NO	NO	NO	NO	NO	NO	NO	NO	NO	NO	NO	NO	NO	NO	NO	NO	NO	NO	NO	NO	NO	NO	NO	NO	NO	NO	NO	NO	NO	NO
K47	K. pneumoniae	CIP 53.23	NO	NO	NO	NO	NO	NO	NO	NO	NO	NO	NO	NO	NO	NO	NO	NO	NO	NO	NO	NO	NO	NO	NO	NO	NO	NO	NO	NO	NO	NO
K48	K. pneumoniae	CIP 53.24	NO	NO	NO	NO	NO	NO	NO	NO	NO	NO	NO	NO	NO	NO	NO	NO	NO	NO	NO	NO	NO	NO	NO	NO	NO	NO	NO	NO	NO	NO
K49	K. pneumoniae	CIP 52.199	NO	NO	NO	NO	NO	NO	NO	NO	NO	NO	NO	NO	NO	NO	NO	NO	NO	NO	NO	NO	NO	NO	NO	NO	NO	NO	NO	NO	NO	NO
K50	K. pneumoniae	CIP 52.200	NO	NO	NO	NO	NO	NO	NO	NO	NO	NO	NO	NO	NO	NO	NO	NO	NO	NO	NO	NO	NO	NO	NO	NO	NO	NO	NO	NO	NO	NO
K51	K. pneumoniae	CIP 52.201	NO	NO	NO	NO	NO	NO	NO	NO	NO	NO	NO	NO	NO	NO	NO	NO	NO	NO	NO	NO	NO	NO	NO	NO	NO	NO	NO	NO	NO	NO
K52	K. pneumoniae	CIP 53.25	NO	NO	NO	NO	NO	NO	NO	NO	NO	NO	NO	NO	NO	NO	NO	NO	NO	NO	NO	NO	NO	NO	NO	NO	NO	NO	NO	NO	NO	NO
K53	K. pneumoniae	CIP 53.26	NO	NO	NO	NO	NO	NO	NO	NO	NO	NO	NO	NO	NO	NO	NO	NO	NO	NO	NO	NO	NO	NO	NO	NO	NO	NO	NO	NO	NO	NO
K54	K. pneumoniae	CIP 53.27	NO	NO	NO	NO	NO	NO	NO	NO	NO	NO	NO	NO	NO	NO	NO	NO	NO	NO	NO	NO	NO	NO	NO	NO	NO	NO	NO	NO	NO	NO
K55	K. pneumoniae	NCTC 9175	NO	NO	NO	NO	NO	NO	NO	NO	NO	NO	NO	NO	NO	NO	NO	NO	NO	NO	NO	NO	NO	NO	NO	NO	NO	NO	NO	NO	NO	NO
K56	K. pneumoniae	NCTC 9176	NO	NO	NO	NO	NO	NO	NO	NO	NO	NO	NO	NO	NO	NO	NO	NO	NO	NO	NO	NO	NO	NO	NO	NO	NO	NO	NO	NO	NO	NO
K57	K. pneumoniae	NCTC 9177	NO	NO	NO	NO	NO	NO	NO	NO	NO	NO	NO	NO	NO	NO	NO	NO	NO	NO	NO	NO	NO	NO	NO	NO	NO	NO	NO	NO	NO	NO
K58	K. pneumoniae	NCTC 9178.1	NO	NO	NO	NO	NO	NO	NO	NO	NO	NO	NO	NO	NO	NO	NO	NO	NO	NO	NO	NO	NO	NO	NO	NO	NO	NO	NO	NO	NO	NO
		NCTC 9178.2	NO	NO	NO	NO	NO	NO	NO	NO	NO	NO	NO	NO	NO	NO	NO	NO	NO	NO	NO	NO	NO	NO	NO	NO	NO	NO	NO	NO	NO	NO
K59	Raoultella planticola	NCTC 9179	NO	NO	NO	NO	NO	NO	NO	NO	NO	NO	NO	NO	NO	NO	NO	NO	NO	NO	NO	NO	NO	NO	NO	NO	NO	NO	NO	NO	NO	NO
K60	K. pneumoniae	NCTC 9180	NO	NO	NO	NO	NO	NO	NO	NO	NO	NO	NO	NO	NO	NO	NO	NO	NO	NO	NO	NO	NO	NO	NO	NO	NO	NO	NO	NO	NO	NO
K61	K. pneumoniae	NCTC 9181.1	NO	NO	NO	NO	NO	NO	NO	NO	NO	NO	NO	NO	NO	NO	NO	NO	NO	NO	NO	NO	NO	NO	NO	NO	NO	NO	NO	NO	NO	NO
		NCTC 9181.2	NO	NO	NO	NO	NO	NO	NO	NO	NO	NO	NO	NO	NO	NO	NO	NO	NO	NO	NO	NO	NO	NO	NO	NO	NO	NO	NO	NO	NO	NO
K61	K. pneumoniae	CIP 108293.1	NO	NO	NO	NO	NO	NO	NO	NO	NO	NO	NO	NO	NO	NO	NO	NO	NO	NO	NO	NO	NO	NO	NO	NO	NO	NO	NO	NO	NO	NO
		CIP 108283.2	NO	NO	NO	NO	NO	NO	NO	NO	NO	NO	NO	NO	NO	NO	NO	NO	NO	NO	NO	NO	NO	NO	NO	NO	NO	NO	NO	NO	NO	NO
K62	K. pneumoniae	NCTC 9182	NO	NO	NO	NO	NO	NO	NO	NO	NO	NO	NO	NO	NO	NO	NO	NO	NO	NO	NO	NO	NO	NO	NO	NO	NO	NO	NO	NO	NO	NO
K63	K. pneumoniae	NCTC 9183.1	HALO	NO	NO	HALO	NO	HALO	NO	NO	HALO	NO	HALO	NO	NO	HALO	NO	HALO	NO	NO	HALO	NO	HALO	NO	NO	HALO	NO	HALO	NO	NO	HALO	NO
		NCTC 9183.2	NO	NO	NO	NO	NO	NO	NO	NO	NO	NO	NO	NO	NO	NO	NO	NO	NO	NO	NO	NO	NO	NO	NO	NO	NO	NO	NO	NO	NO	NO
K63	K. pneumoniae	Kp11	HALO	NO	NO	HALO	NO	HALO	NO	NO	HALO	NO	HALO	NO	NO	HALO	NO	HALO	NO	NO	HALO	NO	HALO	NO	NO	HALO	NO	HALO	NO	NO	HALO	NO
K63	K. pneumoniae	Kp271	HALO	NO	NO	HALO	NO	HALO	NO	NO	HALO	NO	HALO	NO	NO	HALO	NO	HALO	NO	NO	HALO	NO	HALO	NO	NO	HALO	NO	HALO	NO	NO	HALO	NO
K63	K. pneumoniae	Kp79	HALO	NO	NO	HALO	NO	HALO	NO	NO	HALO	NO	HALO	NO	NO	HALO	NO	HALO	NO	NO	HALO	NO	HALO	NO	NO	HALO	NO	HALO	NO	NO	HALO	NO
K63	K. pneumoniae	Kp77	HALO	NO	NO	HALO	NO	HALO	NO	NO	HALO	NO	HALO	NO	NO	HALO	NO	HALO	NO	NO	HALO	NO	HALO	NO	NO	HALO	NO	HALO	NO	NO	HALO	NO
K63	K. pneumoniae	Kp486	HALO	NO	NO	HALO	NO	HALO	NO	NO	HALO	NO	HALO	NO	NO	HALO	NO	HALO	NO	NO	HALO	NO	HALO	NO	NO	HALO	NO	HALO	NO	NO	HALO	NO
K64	K. pneumoniae	NCTC 9184	NO	NO	NO	NO	NO	NO	NO	NO	NO	NO	NO	NO	NO	NO	NO	NO	NO	NO	NO	NO	NO	NO	NO	NO	NO	NO	NO	NO	NO	NO
		CIP 80.47	NO	NO	NO	NO	NO	NO	NO	NO	NO	NO	NO	NO	NO	NO	NO	NO	NO	NO	NO	NO	NO	NO	NO	NO	NO	NO	NO	NO	NO	NO
K65	Raoutella terrigena	NCTC 9185	NO	NO	NO	NO	NO	NO	NO	NO	NO	NO	NO	NO	NO	NO	NO	NO	NO	NO	NO	NO	NO	NO	NO	NO	NO	NO	NO	NO	NO	NO
K66	K. oxytoca	NCTC 9186	NO	NO	NO	NO	NO	NO	NO	NO	NO	NO	NO	NO	NO	NO	NO	NO	NO	NO	NO	NO	NO	NO	NO	NO	NO	NO	NO	NO	NO	NO
K67	Klebsiella sp.	NCTC 9187	NO	NO	NO	NO	NO	NO	NO	NO	NO	NO	NO	NO	NO	NO	NO	NO	NO	NO	NO	NO	NO	NO	NO	NO	NO	NO	NO	NO	NO	NO
K68	Klebsiella sp.	NCTC 9188	NO	NO	NO	NO	NO	NO	NO	NO	NO	NO	NO	NO	NO	NO	NO	NO	NO	NO	NO	NO	NO	NO	NO	NO	NO	NO	NO	NO	NO	NO
K69	Klebsiella sp.	NCTC 9189	NO	NO	NO	NO	NO	NO	NO	NO	NO	NO	NO	NO	NO	NO	NO	NO	NO	NO	NO	NO	NO	NO	NO	NO	NO	NO	NO	NO	NO	NO
K70	K. oxytoca	NCTC 10261	NO	NO	NO	NO	NO	NO	NO	NO	NO	NO	NO	NO	NO	NO	NO	NO	NO	NO	NO	NO	NO	NO	NO	NO	NO	NO	NO	NO	NO	NO
K71	K. pneumoniae	NCTC 10262	NO	NO	NO	NO	NO	NO	NO	NO	NO	NO	NO	NO	NO	NO	NO	NO	NO	NO	NO	NO	NO	NO	NO	NO	NO	NO	NO	NO	NO	NO
K72	Raoutella planticola	NCTC 10263	NO	NO	NO	NO	NO	NO	NO	NO	NO	NO	NO	NO	NO	NO	NO	NO	NO	NO	NO	NO	NO	NO	NO	NO	NO	NO	NO	NO	NO	NO
K74	K. oxytoca	NCTC 11355	NO	NO	NO	NO	NO	NO	NO	NO	NO	NO	NO	NO	NO	NO	NO	NO	NO	NO	NO	NO	NO	NO	NO	NO	NO	NO	NO	NO	NO	NO
K79	K. oxytoca	NCTC 11356	NO	NO	NO	NO	NO	NO	NO	NO	NO	NO	NO	NO	NO	NO	NO	NO	NO	NO	NO	NO	NO	NO	NO	NO	NO	NO	NO	NO	NO	NO
K80	K. pneumoniae	NCTC 11357	NO	NO	NO	NO	NO	NO	NO	NO	NO	NO	NO	NO	NO	NO	NO	NO	NO	NO	NO	NO	NO	NO	NO	NO	NO	NO	NO	NO	NO	NO
K81	K. pneumoniae	NCTC 11358	NO	NO	NO	NO	NO	NO	NO	NO	NO	NO	NO	NO	NO	NO	NO	NO	NO	NO	NO	NO	NO	NO	NO	NO	NO	NO	NO	NO	NO	NO
K82	K. pneumoniae	NCTC 11359	NO	NO	NO	NO	NO	NO	NO	NO	NO	NO	NO	NO	NO	NO	NO	NO	NO	NO	NO	NO	NO	NO	NO	NO	NO	NO	NO	NO	NO	NO

## Sheet: T S4
Table S4. Enzymatic activity of controls of chimeric variants obtained by the reassembly of KP32gp38 and K11gp0043 with position marker (PM) between domains. A blue colour indicates a KP32 origin, whereas grey indicates a K11 origin. WT = wild-type; CP = conserved peptide; E = enzymatic domain; LIN = linker between enzymatic domain and CBM; CBM = carbohydrate-binding module; LEC = lectin-like dom…
	Scheme	Name	Domains at N-terminus	Domains at C-terminus	Specificity of chimera	Activity (compared to WT)
		KP32gp38_WT	KP32gp38_CP-E- LIN-CBM-LEC		K21/KL163	1
		KP32gp38_CP-E_PM_LIN-CBM-LEC	KP32gp38_CP-E	KP32gp38_LIN-CBM-LEC	K21/KL163	0.1
		KP32gp38_CP-E-LIN_PM_CBM-LEC	KP32gp38_CP-E-LIN	KP32gp38_CBM-LEC	K21/KL163	0.004
		KP32gp38_CP-E-LIN-CBM_PM_LEC	KP32gp38_CP-E-LIN-CBM	KP32gp38_LEC	K21/KL163	0.1
		K11gp0043_WT	K11gp0043_CP-E- LIN-CBM-LEC		K31	1
		K11gp0043_CP-E_PM_LIN-CBM-LEC	K11gp0043_CP-E	K11gp0043_LIN-CBM-LEC	K31	0.1
		K11gp0043_CP-E-LIN_PM_CBM-LEC	K11gp0043_CP-E-LIN	K11gp0043_CBM-LEC	K31	0.000128
		K11gp0043_CP-E-LIN-CBM_PM_LEC	K11gp0043_CP-E-LIN-CBM	K11gp0043_LEC	nd	nd

## Sheet: F S1
Figure S1. Fluorescence-based binding assay. (A) The full-length KP32gp38 (WT) and its enzymatically inactive triple mutant were fused to the C-terminus of GFP and analysed for binding to K. pneumoniae strains of capsular type KL163 (Kp968 – circle), K3 (Kp271 – triangle) and K63 (Kp486 – square). GFP was included as a negative control. The strain with a capsular type KL163 sensitive to enzymatic…

## Sheet: T S5-7
Table S5. Primers used for tile creation of truncated RBPs, together with tile sequence. In the primers to the sequence of interest following features were added: SapI recognition site (NNN GCTCTTC N); overhangs to insert sequence into pVTE entry vector for tiles creation (AGA or CTT); BsaI recognition site (GGTCTC); six-nucleotide-long position marker (PM) for VersaTile reaction (PS: ACCATG; PM:…
Construct name in pVTD3 vector	Primer FOR name	Primer FOR sequence	Primer REV name	Primer REV sequence	Total tile sequence
KP32gp38_WT (1-576) PS PE	KP32gp38ConPep1 PS FOR	ATA GCTCTTCC AGA GGTCTC ACCATG TTAGACAATTTCAATCAGCCGAAAG	KP32gp38LEC576 PE REV	ATA GCTCTTCC CTT GGTCTC GTACTG TGATACGAATGCCCTTACTCGGCATCG	AGA GGTCTC ACCATG TTAGACAATTTCAATCAGCCGAAAGGCTCAACCATTGGTGTGCTCAAGGATGGGCGCACTATCCAAGAGGCATTCGACTCATTACCGCGCCTTGAGTCC TTCTCTGGGTCCACGGCAACCGACAAGCTACGCGCAGCCATCACCTTAGGTGTATCTGAGGTCGCCATCGGTCCTGTTGAAGGTAACGGCGGAAGGCCTTATGAGTTCGGGGATGTAGTCATTCCGTATCCTCTGCGTATTGTAGGTTGTGGTTCTCAAGGTATCAACGTTACCAAGGGAACAGTCCTCAAGCGTTCTGCGGGTGCATCCTTCATGTTCCACTTCACGGGCGAGGGACAAGCTCAGCGTCCTATGGGCGGTGGGTTGTTTAACATCAACCT…
KP32gp38_ΔCP (30-576) PS PE	KP32gp38 Enz30 PS FOR	ATA GCTCTTCA AGA GGTCTC ACCATG CCGCGCCTTGAGTCCTTCTCTG	KP32gp38LEC576 PE REV	ATA GCTCTTCC CTT GGTCTC GTACTG TGATACGAATGCCCTTACTCGGCATCG	AGA GGTCTC ACCATG CCGCGCCTTGAG TCCTTCTCTGGGTCCACGGCAACCGACAAGCTACGCGCAGC CATCACCTTAGGTGTATCTGAGGTCGCCATCGGTCCTGTTGAAGGTAACGGCGGAAGGCCTTATGAGTTC GGGGATGTAGTCATTCCGTATCCTCTGCGTATTGTAGGTTGTGGTTCTCAAGGTATCAACGTTACCAAGG GAACAGTCCTCAAGCGTTCTGCGGGTGCATCCTTCATGTTCCACTTCACGGGCGAGGGACAAGCTCAGCG TCCTATGGGCGGTGGGTTGTTTAACATCAACCTGAATGGGGACACAGCGACAGCTCTGGGAGACATAATC AAGGTTACGCAGTGGTCTTACTTCAAGGCTAATAACTGCGCG…
KP32gp38_ΔLEC (1-487) PS PE	KP32gp38ConPep1 PS FOR	ATA GCTCTTCC AGA GGTCTC ACCATG TTAGACAATTTCAATCAGCCGAAAG	KP32gp38CBM487 PE REV	ATA GCTCTTCC CTT GGTCTC GTACTG AACCTTTCCAAACACCATACCATC	AGA GGTCTC ACCATG TTAGACAATTTCAATCAGCCGAAAGGCTCAACCATTGGTGTGCTCAAGGATGGGCGCACTATCCAAGAGGCATTCGACTCATTACCGCGCCTTGAGTCC TTCTCTGGGTCCACGGCAACCGACAAGCTACGCGCAGCCATCACCTTAGGTGTATCTGAGGTCGCCATCGGTCCTGTTGAAGGTAACGGCGGAAGGCCTTATGAGTTCGGGGATGTAGTCATTCCGTATCCTCTGCGTATTGTAGGTTGTGGTTCTCAAGGTATCAACGTTACCAAGGGAACAGTCCTCAAGCGTTCTGCGGGTGCATCCTTCATGTTCCACTTCACGGGCGAGGGACAAGCTCAGCGTCCTATGGGCGGTGGGTTGTTTAACATCAACCT…
KP32gp38_Δ(CP-LEC) (30-487) PS PE	KP32gp38 Enz30 PS FOR	ATA GCTCTTCA AGA GGTCTC ACCATG CCGCGCCTTGAGTCCTTCTCTG	KP32gp38CBM487 PE REV	ATA GCTCTTCC CTT GGTCTC GTACTG AACCTTTCCAAACACCATACCATC	AGA GGTCTC ACCATG CCGCGCCTTGAG TCCTTCTCTGGGTCCACGGCAACCGACAAGCTACGCGCAGC CATCACCTTAGGTGTATCTGAGGTCGCCATCGGTCCTGTTGAAGGTAACGGCGGAAGGCCTTATGAGTTC GGGGATGTAGTCATTCCGTATCCTCTGCGTATTGTAGGTTGTGGTTCTCAAGGTATCAACGTTACCAAGG GAACAGTCCTCAAGCGTTCTGCGGGTGCATCCTTCATGTTCCACTTCACGGGCGAGGGACAAGCTCAGCG TCCTATGGGCGGTGGGTTGTTTAACATCAACCTGAATGGGGACACAGCGACAGCTCTGGGAGACATAATC AAGGTTACGCAGTGGTCTTACTTCAAGGCTAATAACTGCGCG…
KP32gp38_ Δ(CBM-LEC) (1-379) PS PE	KP32gp38 ConPep 1 PS FOR	ATA GCTCTTCC AGA GGTCTC ACCATG TTAGACAATTTCAATCAGCCGAAAG	KP32gp38Enz379 PE REV	ATA GCTCTTCA CTT GGTCTC TTACTG TAGCCGGGTGTTGCCCGGAAG	AGA GGTCTC ACCATG TTAGACAATTTCAATCAGCCGAAAGGCTCAACCATTGGTGTGCTCAAGGATGGGCGCACTATCCAAGAGGCATTCGACTCATTACCGCGCCTTGAGTCCTTCTCTGGGTCCACGGCAACCGACAAGCTACGCGCAGCCATCACCTTAGGTGTATCTGAGGTCGCCATCGGTCCTGTTGAAGGTAACGGCGGAAGGCCTTATGAGTTCGGGGATGTAGTCATTCCGTATCCTCTGCGTATTGTAGGTTGTGGTTCTCAAGGTATCAACGTTACCAAGGGAACAGTCCTCAAGCGTTCTGCGGGTGCATCCTTCATGTTCCACTTCACGGGCGAGGGACAAGCTCAGCGTCCTATGGGCGGTGGGTTGTTTAACATCAACCTG…
KP32gp38_ Δ(CP-CBM-LEC) (30-379) PS PE	KP32gp38 Enz30 PS FOR	ATA GCTCTTCA AGA GGTCTC ACCATG CCGCGCCTTGAGTCCTTCTCTG	KP32gp38Enz379 PE REV	ATA GCTCTTCA CTT GGTCTC TTACTG TAGCCGGGTGTTGCCCGGAAG	AGA GGTCTC ACCATG CCGCGCCTTGAGTCCTTCTCTGGGTCCACGGCAACCGACAAGCTACGCGCAGC CATCACCTTAGGTGTATCTGAGGTCGCCATCGGTCCTGTTGAAGGTAACGGCGGAAGGCCTTATGAGTTC GGGGATGTAGTCATTCCGTATCCTCTGCGTATTGTAGGTTGTGGTTCTCAAGGTATCAACGTTACCAAGG GAACAGTCCTCAAGCGTTCTGCGGGTGCATCCTTCATGTTCCACTTCACGGGCGAGGGACAAGCTCAGCG TCCTATGGGCGGTGGGTTGTTTAACATCAACCTGAATGGGGACACAGCGACAGCTCTGGGAGACATAATC AAGGTTACGCAGTGGTCTTACTTCAAGGCTAATAACTGCGCGT…
KP32gp88_CP-E (1-360) PS PE	KP32gp38ConPep1 PSFOR	ATA GCTCTTCC AGA GGTCTC ACCATG TTAGACAATTTCAATCAGCCGAAAG	KP32gp38Enz360 PE REV	ATA GCTCTTCC CTT GGTCTC TTACTG CTGGCCCACCGAGACGTTACCATTCGAC	AGA GGTCTC ACCATG TTAGACAATTTCAATCAGCCGAAAGGCTCAACCATTGGTGTGCTCAAGGATGGGCGCACTATCCAAGAGGCATTCGACTCATTACCGCGCCTTGAGTCC TTCTCTGGGTCCACGGCAACCGACAAGCTACGCGCAGCCATCACCTTAGGTGTATCTGAGGTCGCCATCGGTCCTGTTGAAGGTAACGGCGGAAGGCCTTATGAGTTCGGGGATGTAGTCATTCCGTATCCTCTGCGTATTGTAGGTTGTGGTTCTCAAGGTATCAACGTTACCAAGGGAACAGTCCTCAAGCGTTCTGCGGGTGCATCCTTCATGTTCCACTTCACGGGCGAGGGACAAGCTCAGCGTCCTATGGGCGGTGGGTTGTTTAACATCAACCT…
KP32gp38_E (30-360) PS PE	KP32gp38 Enz30 PS FOR	ATA GCTCTTCA AGA GGTCTC ACCATG CCGCGCCTTGAGTCCTTCTCTG	KP32gp38Enz360 PE REV	ATA GCTCTTCC CTT GGTCTC TTACTG CTGGCCCACCGAGACGTTACCATTCGAC	AGA GGTCTC ACCATG CCGCGCCTTGAG TCCTTCTCTGGGTCCACGGCAACCGACAAGCTACGCGCAGC CATCACCTTAGGTGTATCTGAGGTCGCCATCGGTCCTGTTGAAGGTAACGGCGGAAGGCCTTATGAGTTC GGGGATGTAGTCATTCCGTATCCTCTGCGTATTGTAGGTTGTGGTTCTCAAGGTATCAACGTTACCAAGG GAACAGTCCTCAAGCGTTCTGCGGGTGCATCCTTCATGTTCCACTTCACGGGCGAGGGACAAGCTCAGCG TCCTATGGGCGGTGGGTTGTTTAACATCAACCTGAATGGGGACACAGCGACAGCTCTGGGAGACATAATC AAGGTTACGCAGTGGTCTTACTTCAAGGCTAATAACTGCGCG…
KP32gp38_LIN-CBM-LEC (361-576) PS PE	KP32gp38CBM361 PS FOR	ATA GCTCTTCCAGA GGTCTC ACCATG CAGATTCTCCCCGATGGTTACATCAAC	KP32gp38LEC576 PE REV	ATA GCTCTTCC CTT GGTCTC GTACTG TGATACGAATGCCCTTACTCGGCATCG	AGA GGTCTC ACCATG CAGATTCTCCCCGATGGTTACATCAACATGGCGGAGCTTCCGGGCAACACCCGGCTACCTTCGGAGTACGATGCAGACGGTGAGACAACTTCGGTGTTGCGTGTACCAGCTAACACTCAGGTGCGCCAGTGGTCCGTCCCTAAGATGTATAAGGATGGACTTACCGTGACCAAGGTCACTGTACGGGCCAAGGGTGCAGCGGCTGGTGCTATCCTCTCGTTGCAGAGCGGCTCAACCGTATTATCCACCAAGTCTATTGACGCTGGGGTGTGGAAGAACTACGTGTTCTACGTGAAGGCAAACCAATTGCAGGAAACATTGCAGCTCCGCAATACTGGCACTGCTGATGTTCTAGCTGATGGTATGGTGTTTGGAAAGGTT…
KP32gp38_CBM-LEC (380-576) PS PE	KP32gp38 CBM 380 PS FOR	ATA GCTCTTCA AGA GGTCTC ACCATG CCTTCGGAGTACGATGCAGACGGTG	KP32gp38LEC576 PE REV	ATA GCTCTTCC CTT GGTCTC GTACTG TGATACGAATGCCCTTACTCGGCATCG	AGA GGTCTC ACCATG CCTTCGGAGTACGATGCAGACGGTGAGACAACTTCGGTGTTGCGTGTACCAGC TAACACTCAGGTGCGCCAGTGGTCCGTCCCTAAGATGTATAAGGATGGACTTACCGTGACCAAGGTCACT GTACGGGCCAAGGGTGCAGCGGCTGGTGCTATCCTCTCGTTGCAGAGCGGCTCAACCGTATTATCCACCA AGTCTATTGACGCTGGGGTGTGGAAGAACTACGTGTTCTACGTGAAGGCAAACCAATTGCAGGAAACATT GCAGCTCCGCAATACTGGCACTGCTGATGTTCTAGCTGATGGTATGGTGTTTGGAAAGGTT GATTATATT GACTGGGACTTCGCAATAGCCCCCGGTACACTAGCTGCTGGT…
KP32gp38_LIN-CBM (361-487) PS PE	KP32gp38CBM361 PS FOR	ATA GCTCTTCC AGA GGTCTC ACCATG CAGATTCTCCCCGATGGTTACATCAAC	KP32gp38CBM487 PE REV	ATA GCTCTTCC CTT GGTCTC GTACTG AACCTTTCCAAACACCATACCATC	AGA GGTCTC ACCATG CAGATTCTCCCCGATGGTTACATCAACATGGCGGAGCTTCCGGGCAACACCCGGCTACCTTCGGAGTACGATGCAGACGGTGAGACAACTTCGGTGTTGCGTGTACCAGCTAACACTCAGGTGCGCCAGTGGTCCGTCCCTAAGATGTATAAGGATGGACTTACCGTGACCAAGGTCACTGTACGGGCCAAGGGTGCAGCGGCTGGTGCTATCCTCTCGTTGCAGAGCGGCTCAACCGTATTATCCACCAAGTCTATTGACGCTGGGGTGTGGAAGAACTACGTGTTCTACGTGAAGGCAAACCAATTGCAGGAAACATTGCAGCTCCGCAATACTGGCACTGCTGATGTTCTAGCTGATGGTATGGTGTTTGGAAAGGTT…
KP32gp38_CBM (380-487) PS PE	KP32gp38 CBM 380 PS FOR	ATA GCTCTTCA AGA GGTCTC ACCATG CCTTCGGAGTACGATGCAGACGGTG	KP32gp38CBM487 PE REV	ATA GCTCTTCC CTT GGTCTC GTACTG AACCTTTCCAAACACCATACCATC	AGA GGTCTC ACCATG CCTTCGGAGTACGATGCAGACGGTGAGACAACTTCGGTGTTGCGTGTACCAGC TAACACTCAGGTGCGCCAGTGGTCCGTCCCTAAGATGTATAAGGATGGACTTACCGTGACCAAGGTCACT GTACGGGCCAAGGGTGCAGCGGCTGGTGCTATCCTCTCGTTGCAGAGCGGCTCAACCGTATTATCCACCA AGTCTATTGACGCTGGGGTGTGGAAGAACTACGTGTTCTACGTGAAGGCAAACCAATTGCAGGAAACATT GCAGCTCCGCAATACTGGCACTGCTGATGTTCTAGCTGATGGTATGGTGTTTGGAAAGGTT CAGTAC GAGACC AAG
KP32gp38_LEC (488-576) PS PE	KP32gp38LEC488 PS FOR	ATA GCTCTTCC AGA GGTCTC ACCATG GATTATATTGACTGGGACTTCGCAATAG	KP32gp38LEC576 PE REV	ATA GCTCTTCC CTT GGTCTC GTACTG TGATACGAATGCCCTTACTCGGCATCG	AGA GGTCTC ACCATG GATTATATTGACTGGGACTTCGCAATAGCCCCCGGTACACTAGCTGCTGGTGCCAAGTATACAACACCTAACCAGTCGTACCTAGATGTTGCTGGGATGCGCGTTCAGGCCGTTAGTATTCCAATGTTCGACGGACCAACAACAGGGTTGCAGGTCTGGGTTGAAGCAACCAGCGCCAACGGTTCGTTTGTTGTTGTCATGAAGAACGACACAGGGTCTGAGCTGGTGACCACAGTAACACGATGCCGAGTAAGGGCATTCGTATCA CAGTAC GAGACC AAG
Table S6. Primers used for tiles creation of chimeric RBPs, together with tile sequence. In the primers to the sequence of interest following features were added: SapI recognition site (NNN GCTCTTC N); overhangs to insert sequence into pVTE entry vector for tiles creation (AGA or CTT); BsaI recognition site (GGTCTC); six-nucleotide-long position marker (PM) for VersaTile reaction (PM_S: ACCATG; P…
Tile name	Primer FOR name	Primer sequence	Primer REV name	Primer sequence	Total tile sequence
KP34gp57 PS PM	KP34gp57 ConPep PS FOR	ATA GCTCTTCC AGA GGTCTC ACCATG GCACTCACTAAACTAGTAGATGCAGG	KP34gp57 Enz630 PM REV	ATA GCTCTTCA CTT GGTCTC ACTACC ACCAGTGAGTTCAGATGGAGC	AGA GGTCTC ACCATG GCACTCACTAAACTAGTAGATGCAGGCGCCTGGCAAGTAGAAGTAGCCCCAGCTGGCACAGTACAGG ATTCCCTAGTATTCTTATCCCCACGCAACTTCGGAGGAGTACCAGGCACGGGCGTAGATAGTGTAGCAGC TATAGAAGCCGCCCTAGCGGCAGGCGACGTAGACTTAGGTGGTGAGCACTGGTTTATTAGCAGGCCCATC TATTGCGTATCCGGCCGTACCATTCAGAACGGTAAGATTTCTACCTTAGCAGCCCAAGGCTCTGGGTTTA TGGCTGGCAGTATCTTCGCACCGGGGAACTATCACCCTGTATACGTAGACCCTGTGCCGAAGCTGGCATG CTCAAGTACAAACGGCTCAGCCACTATTA…
K11gp17 PS PM	K11gp17 Anchor1 PS FOR	GTG GCTCTTCC AGA GGTCTC ACCATG GACCAAGACATTAAAACAGTCATTC	K11gp17 Enz875 PM REV	GTG GCTCTTCA CTT GGTCTC ACTACC TAAAACAAATGATGCTAATCTCGAGATGTTC	AGA GGTCTC ACCATG GACCAAGACATTAAAACAGTCATTCAGTACCCAGTAGGGGCCACTGAGTTCGACATCCCGTTCGACT ACCTGTCCCGTAAGTTTGTCCGTGTGTCGCTGGCAGCTGACGACAACCGCAGACTGCTGAGTAACATCAC TGAGTACCGCTACGTGTCTAAGACCAGAGTGAAGCTCCTTGTGGAAACTACCGGGTTCGACCGTGTGGAA ATCCGCAGATTCACCTCAGCGTCTGAGCGTATTGTTGACTTCAGCGACGGCTCCGTACTGCGGGCAACAG ACCTTAACGTTTCTCAGATTCAGTCTGCCCATATCGCAGAGGAAGCACGTGATTCAGCACTGTTGGCTAT GCCGCAGGATGATGCTGGCAACCTTGATG…
K11gp0043 PS PM	K11gp0043 ConPep1 PS FOR	GTG GCTCTTCC AGA GGTCTC ACCATG CTGAATGATTTAAACCAACCACGAGGCTC	K11_0043 Enz596 PM REV	ATA GCTCTTCA CTT GGTCTC ACTACC GTTAAGGAACAGCCTAACCGTAACCTG	AGA GGTCTC ACCATG CTGAATGATTTAAACCAACCACGAGGCTCGACGCTGGGCCTCTTTACTCCAAACCTTCCGTTGAAGA AGCGGTTGGACACCTTACCAAACATTTTAGATTTTGATTCAGACAGCCTTAACGATGATAGCACTCGGTT TCAAAAGGCTATTACAGCTGGTGTGAAATCTTTATACGTCCCAGAACCTCAGTTCTTTGGCAACAATAAG CCTCTTAAAATTGCTAACGTTGACATTGTGACCAATATGCACATCTACGGGAACGGCTCAGCGGGATACC GTCAGGTTGGCGGGGCCATCACCATCCTAGATGGAGCGGACTATGGGTTTAAACTGGCTGGTGTCGACTC TCAGACGCGAAACATTGGAGGCCGCATTG…
KP36gp50 PS PM	KP36gp50 Anchor1 PS FOR	GTG GCTCTTCC AGA GGTCTC ACCATG GCACTATACAGAGAAGGCAAAGC	KP36gp50 Enz883 PM REV	GTG GCTCTTCA CTT GGTCTC ACTACC TGCCGTCAAATCTTCTAACTGAAGATTC	AGA GGTCTC ACCATG GCACTATACAGAGAAGGCAAAGCGGCTATGGCCGCAGACGGAACCGTTACCGGGACTGGCACAAAAT GGCAATCTTCGCTTTCGCTGATTCGCCCAGGCGCGACGATTATGTTTTTGTCGTCACCAATTCAAATGGC CGTCGTAAACAAGGTGGTTAGCGATACTGAAATTAAAGCCATCACCACAAACGGCGCTGTCGTAGCGTCT AGCGATTACGCGATCCTGTTAAGTGACTCACTTACCGTTGACGGTCTGGCGCAAGATGTTGCTGAAACTC TGCGCTACTATCAGTCACAGGAAACCGTGATCGCGGATGCAGTCGAGTTCTTCAAGAACTTTGATTTCGA TTCCCTGCAAGATCTTGCTAACCAAATTA…
KP32gp37 PS PM	32gp37 Anchor1 PS FOR	GTG GCTCTTCC AGA GGTCTC ACCATG GACCAAGATATTAAAACAATCATTCAGTAC	KP32gp37 Chap869 PM REV	ATA GCTCTTCA CTT GGTCTC ACTACC TTTGTAGGTCAGGCCGAGCTTAC	AGA GGTCTC ACCATG GACCAAGATATTAAAACAATCATTCAGTACCCAACAGGAGCCACTGAGTTTGACATCCCGTTTGACT ACCTGTCCCGCAAGTTTGTCCGCGTGTCTCTGGTATCGGACGACAACCGCCGACTCTTGCGCAACATCAC GGAGTACCGTTACGTGTCGAAGACTCGCGTTAAGATTCTGGTGGACACCACTGGGTTCGACCGAGTTGAA ATCCGACGGTTCACCTCAGCGTCTGAACGTGTTGTGGACTTCAGTGATGGCTCTGTGCTCCGCGCTAACG ACCTAAACGTGTCCCAGCTACAGTCTTCACATATTGCCGAAGAGGCCCGTGACAGTGCGCTTCTGGCCAT GCCTGAGGATGATGCTGGTAACCTCGACG…
KP32gp38_CBM (380-487) PM PE	KP32gp38 CBM 380 PM FOR	ATA GCTCTTCA AGA GGTCTC GGTAGT CCTTCGGAGTACGATGCAGACGGTG	KP32gp38CBM487 PE REV	ATA GCTCTTCC CTT GGTCTC GTACTG AACCTTTCCAAACACCATACCATC	AGA GGTCTC GGTAGT CCTTCGGAGTACGATGCAGACGGTGAGACAACTTCGGTGTTGCGTGTACCAGC TAACACTCAGGTGCGCCAGTGGTCCGTCCCTAAGATGTATAAGGATGGACTTACCGTGACCAAGGTCACT GTACGGGCCAAGGGTGCAGCGGCTGGTGCTATCCTCTCGTTGCAGAGCGGCTCAACCGTATTATCCACCA AGTCTATTGACGCTGGGGTGTGGAAGAACTACGTGTTCTACGTGAAGGCAAACCAATTGCAGGAAACATT GCAGCTCCGCAATACTGGCACTGCTGATGTTCTAGCTGATGGTATGGTGTTTGGAAAGGTT CAGTAC GAGACC AAG
KP32gp38_CBM-LEC (380-576) PM PE	KP32gp38 CBM 380 PM FOR	ATA GCTCTTCA AGA GGTCTC GGTAGT CCTTCGGAGTACGATGCAGACGGTG	KP32gp38LEC576 PE REV	ATA GCTCTTCC CTT GGTCTC GTACTG TGATACGAATGCCCTTACTCGGCATCG	AGA GGTCTC GGTAGT CCTTCGGAGTACGATGCAGACGGTGAGACAACTTCGGTGTTGCGTGTACCAGC TAACACTCAGGTGCGCCAGTGGTCCGTCCCTAAGATGTATAAGGATGGACTTACCGTGACCAAGGTCACT GTACGGGCCAAGGGTGCAGCGGCTGGTGCTATCCTCTCGTTGCAGAGCGGCTCAACCGTATTATCCACCA AGTCTATTGACGCTGGGGTGTGGAAGAACTACGTGTTCTACGTGAAGGCAAACCAATTGCAGGAAACATT GCAGCTCCGCAATACTGGCACTGCTGATGTTCTAGCTGATGGTATGGTGTTTGGAAAGGTT GATTATATT GACTGGGACTTCGCAATAGCCCCCGGTACACTAGCTGCTGGT…
KP32gp38_LIN-CBM ( 361-487) PM PE	KP32gp38CBM361 PM FOR	ATA GCTCTTCC AGA GGTCTC GGTAGT CAGATTCTCCCCGATGGTTACATCAAC	KP32gp38CBM487 PE REV	ATA GCTCTTCC CTT GGTCTC GTACTG AACCTTTCCAAACACCATACCATC	AGA GGTCTC GGTAGT CAGATTCTCCCCGATGGTTACATCAACATGGCGGAGCTTCCGGGCAACACCCGGCTACCTTCGGAGTACGATGCAGACGGTGAGACAACTTCGGTGTTGCGTGTACCAGCTAACACTCAGGTGCGCCAGTGGTCCGTCCCTAAGATGTATAAGGATGGACTTACCGTGACCAAGGTCACTGTACGGGCCAAGGGTGCAGCGGCTGGTGCTATCCTCTCGTTGCAGAGCGGCTCAACCGTATTATCCACCAAGTCTATTGACGCTGGGGTGTGGAAGAACTACGTGTTCTACGTGAAGGCAAACCAATTGCAGGAAACATTGCAGCTCCGCAATACTGGCACTGCTGATGTTCTAGCTGATGGTATGGTGTTTGGAAAGGTT…
KP32gp38_LIN-CBM-LEC (361-576) PM PE	KP32gp38CBM361 PM FOR	ATA GCTCTTCC AGA GGTCTC GGTAGT CAGATTCTCCCCGATGGTTACATCAAC	KP32gp38LEC576 PE REV	ATA GCTCTTCC CTT GGTCTC GTACTG TGATACGAATGCCCTTACTCGGCATCG	AGA GGTCTC GGTAGT CAGATTCTCCCCGATGGTTACATCAACATGGCGGAGCTTCCGGGCAACACCCGGCTACCTTCGGAGTACGATGCAGACGGTGAGACAACTTCGGTGTTGCGTGTACCAGCTAACACTCAGGTGCGCCAGTGGTCCGTCCCTAAGATGTATAAGGATGGACTTACCGTGACCAAGGTCACTGTACGGGCCAAGGGTGCAGCGGCTGGTGCTATCCTCTCGTTGCAGAGCGGCTCAACCGTATTATCCACCAAGTCTATTGACGCTGGGGTGTGGAAGAACTACGTGTTCTACGTGAAGGCAAACCAATTGCAGGAAACATTGCAGCTCCGCAATACTGGCACTGCTGATGTTCTAGCTGATGGTATGGTGTTTGGAAAGGTT…
Kp32gp38_LEC (488-576) PM PE	KP32gp38LEC488 PM FOR	ATA GCTCTTCC AGA GGTCTC GGTAGT GATTATATTGACTGGGACTTCGCAATAG	KP32gp38LEC576 PE REV	ATA GCTCTTCC CTT GGTCTC GTACTG TGATACGAATGCCCTTACTCGGCATCG	AGA GGTCTC GGTAGT GATTATATTGACTGGGACTTCGCAATAGCCCCCGGTACACTAGCTGCTGGTGCCAAGTATACAACACCTAACCAGTCGTACCTAGATGTTGCTGGGATGCGCGTTCAGGCCGTTAGTATTCCAATGTTCGACGGACCAACAACAGGGTTGCAGGTCTGGGTTGAAGCAACCAGCGCCAACGGTTCGTTTGTTGTTGTCATGAAGAACGACACAGGGTCTGAGCTGGTGACCACAGTAACACGATGCCGAGTAAGGGCATTCGTATCA CAGTAC GAGACC AAG
KP32gp38_CP-E (1-360) PS PM	KP32gp38ConPep1 PSFOR	ATA GCTCTTCC AGA GGTCTC ACCATG TTAGACAATTTCAATCAGCCGAAAG	KP32gp38Enz360 PM REV	ATA GCTCTTCC CTT GGTCTC ACTACC CTGGCCCACCGAGACGTTACCATTCGAC	AGA GGTCTC ACCATG TTAGACAATTTCAATCAGCCGAAAGGCTCAACCATTGGTGTGCTCAAGGATGGGCGCACTATCCAAGAGGCATTCGACTCATTACCGCGCCTTGAGTCC TTCTCTGGGTCCACGGCAACCGACAAGCTACGCGCAGCCATCACCTTAGGTGTATCTGAGGTCGCCATCGGTCCTGTTGAAGGTAACGGCGGAAGGCCTTATGAGTTCGGGGATGTAGTCATTCCGTATCCTCTGCGTATTGTAGGTTGTGGTTCTCAAGGTATCAACGTTACCAAGGGAACAGTCCTCAAGCGTTCTGCGGGTGCATCCTTCATGTTCCACTTCACGGGCGAGGGACAAGCTCAGCGTCCTATGGGCGGTGGGTTGTTTAACATCAACCT…
KP32gp38_CP-E-LIN (1-379) PS PM	KP32gp38 ConPep 1 PS FOR	ATA GCTCTTCC AGA GGTCTC ACCATG TTAGACAATTTCAATCAGCCGAAAG	KP32gp38Lin379 PM REV	ATA GCTCTTCA CTT GGTCTC ACTACC TAGCCGGGTGTTGCCCGGAAG	AGA GGTCTC ACCATG TTAGACAATTTCAATCAGCCGAAAGGCTCAACCATTGGTGTGCTCAAGGATGGGCGCACTATCCAAGAGGCATTCGACTCATTACCGCGCCTTGAGTCCTTCTCTGGGTCCACGGCAACCGACAAGCTACGCGCAGCCATCACCTTAGGTGTATCTGAGGTCGCCATCGGTCCTGTTGAAGGTAACGGCGGAAGGCCTTATGAGTTCGGGGATGTAGTCATTCCGTATCCTCTGCGTATTGTAGGTTGTGGTTCTCAAGGTATCAACGTTACCAAGGGAACAGTCCTCAAGCGTTCTGCGGGTGCATCCTTCATGTTCCACTTCACGGGCGAGGGACAAGCTCAGCGTCCTATGGGCGGTGGGTTGTTTAACATCAACCTG…
KP32gp38_CP-E-LINCBM (1-487) PS PM	KP32gp38 ConPep 1 PS FOR	ATA GCTCTTCC AGA GGTCTC ACCATG TTAGACAATTTCAATCAGCCGAAAG	KP32gp38 CBM 487 PM REV	ATA GCTCTTCA CTT GGTCTC ACTACC AACCTTTCCAAACACCATACCATCAG	AGA GGTCTC ACCATG TTAGACAATTTCAATCAGCCGAAAGGCTCAACCATTGGTGTGCTCAAGGATGGGCGCACTATCCAAGAGGCATTCGACTCATTACCGCGCCTTGAGTCCTTCTCTGGGTCCACGGCAACCGACAAGCTACGCGCAGCCATCACCTTAGGTGTATCTGAGGTCGCCATCGGTCCTGTTGAAGGTAACGGCGGAAGGCCTTATGAGTTCGGGGATGTAGTCATTCCGTATCCTCTGCGTATTGTAGGTTGTGGTTCTCAAGGTATCAACGTTACCAAGGGAACAGTCCTCAAGCGTTCTGCGGGTGCATCCTTCATGTTCCACTTCACGGGCGAGGGACAAGCTCAGCGTCCTATGGGCGGTGGGTTGTTTAACATCAACCTG…
K11gp0043_CP-E (1-367) PS PM	K11gp0043 ConPep1 PS FOR	GTG GCTCTTCC AGA GGTCTC ACCATG CTGAATGATTTAAACCAACCACGAGGCTC	K11gp0043 Enz 367 PM REV	ATA GCTCTTCA CTT GGTCTC ACTACC CTGGAGGTTTGGTCGGTTACCCGGAG	AGA GGTCTC ACCATG CTGAATGATTTAAACCAACCACGAGGCTCGACGCTGGGCCTCTTTACTCCAAACCTTCCGTTGAAGAAGCGGTTGGACACCTTACCAAACATTTTAGATTTTGATTCAGACAGCCTTAACGATGATAGCACTCGGTTTCAAAAGGCTATTACAGCTGGTGTGAAATCTTTATACGTCCCAGAACCTCAGTTCTTTGGCAACAATAAGCCTCTTAAAATTGCTAACGTTGACATTGTGACCAATATGCACATCTACGGGAACGGCTCAGCGGGATACCGTCAGGTTGGCGGGGCCATCACCATCCTAGATGGAGCGGACTATGGGTTTAAACTGGCTGGTGTCGACTCTCAGACGCGAAACATTGGAGGCCGCATTGACGGT…
K11gp0043_CP-E-LIN (1-388) PS PM	K11gp0043 ConPep1 PS FOR	GTG GCTCTTCC AGA GGTCTC ACCATG CTGAATGATTTAAACCAACCACGAGGCTC	K11gp0043 Lin 388 PM REV	ATA GCTCTTCA CTT GGTCTC ACTACC GGAAGCGTTAGCCCCACCTAAG	AGA GGTCTC ACCATG CTGAATGATTTAAACCAACCACGAGGCTCGACGCTGGGCCTCTTTACTCCAAACCTTCCGTTGAAGAAGCGGTTGGACACCTTACCAAACATTTTAGATTTTGATTCAGACAGCCTTAACGATGATAGCACTCGGTTTCAAAAGGCTATTACAGCTGGTGTGAAATCTTTATACGTCCCAGAACCTCAGTTCTTTGGCAACAATAAGCCTCTTAAAATTGCTAACGTTGACATTGTGACCAATATGCACATCTACGGGAACGGCTCAGCGGGATACCGTCAGGTTGGCGGGGCCATCACCATCCTAGATGGAGCGGACTATGGGTTTAAACTGGCTGGTGTCGACTCTCAGACGCGAAACATTGGAGGCCGCATTGACGGT…
K11gp0043_CP-E-LIN-CBM (1-511) PS PM	K11gp0043 ConPep1 PS FOR	GTG GCTCTTCC AGA GGTCTC ACCATG CTGAATGATTTAAACCAACCACGAGGCTC	K11gp0043 CBM 511 PM REV	ATA GCTCTTCA CTT GGTCTC ACTACC TGCACGTGACACACGGACGCCATC	AGA GGTCTC ACCATG CTGAATGATTTAAACCAACCACGAGGCTCGACGCTGGGCCTCTTTACTCCAAACCTTCCGTTGAAGAAGCGGTTGGACACCTTACCAAACATTTTAGATTTTGATTCAGACAGCCTTAACGATGATAGCACTCGGTTTCAAAAGGCTATTACAGCTGGTGTGAAATCTTTATACGTCCCAGAACCTCAGTTCTTTGGCAACAATAAGCCTCTTAAAATTGCTAACGTTGACATTGTGACCAATATGCACATCTACGGGAACGGCTCAGCGGGATACCGTCAGGTTGGCGGGGCCATCACCATCCTAGATGGAGCGGACTATGGGTTTAAACTGGCTGGTGTCGACTCTCAGACGCGAAACATTGGAGGCCGCATTGACGGT…
K11gp0043_LIN-CBM-LEC (368-595) PM PE	K11gp0043 Lin 368 PM FOR	ATA GCTCTTCA AGA GGTCTC GGTAGT AGCATCGGGGCAATGTCTCCCGGATATC	K11gp0043 LEC 595 PE REV	ATA GCTCTTCC CTT GGTCTC GTACTG GTTAAGGAACAGCCTAACCGTAAC	AGA GGTCTC GGTAGT AGCATCGGGGCAATGTCTCCCGGATATCTCTCTGCGCACTCCTTAGGTGGGGCTAACGCTTCCAACTTCTTTGTGCCAGACACTGGTGCTACCAAGTACGGTACGGTGCTAGAGGCTCAAACTGGTGGTGAGGTTCGCCGCTTGTTCATTCCTAAGGACATTGTTAGCCAGCGTGCTTGCGTTCGAGTTCAGGCCAGAGTGATGCCGTCGCCGACAGCTGATGCCCTTGTGGGGCTGACCTGTGACGGCTCCATTGTTTCCACCACAATCCAAGGCGCAACCCAAGACTACCATACGGTGGCGGCTGGTGGCGGCTGGCAGATTGTCGAGTGGCTCATCCCGGCGTCTAGTTACACTGCGGGCCAGTTAATCTTCACGAAC…
K11gp0043_CBM-LEC (389-595) PM PE	K11gp0043 CBM 389 PM FOR	ATA GCTCTTCA AGA GGTCTC GGTAGT AACTTCTTTGTGCCAGACACTG	K11gp0043 LEC 595 PE REV	ATA GCTCTTCC CTT GGTCTC GTACTG GTTAAGGAACAGCCTAACCGTAAC	AGA GGTCTC GGTAGT AACTTCTTTGTGCCAGACACTGGTGCTACCAAGTACGGTACGGTGCTAGAGGCTCAAACTGGTGGTGAGGTTCGCCGCTTGTTCATTCCTAAGGACATTGTTAGCCAGCGTGCTTGCGTTCGAGTTCAGGCCAGAGTGATGCCGTCGCCGACAGCTGATGCCCTTGTGGGGCTGACCTGTGACGGCTCCATTGTTTCCACCACAATCCAAGGCGCAACCCAAGACTACCATACGGTGGCGGCTGGTGGCGGCTGGCAGATTGTCGAGTGGCTCATCCCGGCGTCTAGTTACACTGCGGGCCAGTTAATCTTCACGAACCGTAGTGACACCGTCAAGTTCAAACTTGATGGCGTCCGTGTGTCACGTGCAGACTTCGTAGAT…
K11gp0043_LEC (512-595) PM PE	K11gp0043 LEC 512 PM FOR	ATA GCTCTTCA AGA GGTCTC GGTAGT GACTTCGTAGATGTGACGATTGC	K11gp0043 LEC 595 PE REV	ATA GCTCTTCC CTT GGTCTC GTACTG GTTAAGGAACAGCCTAACCGTAAC	AGA GGTCTC GGTAGT GACTTCGTAGATGTGACGATTGCATGGAGTCCGACCCCAATCTCCGCAGGGTCTGTGGTAAACACCACTGCATCAATCACTCGCGTAAGTTCCCACGTGGTCGGCACTAGTGGTCTGAAGACAGACGGTACGTTAGGTGGCGCTGTTAGTAGCTCTTATTTCAACCGTGGGGCCAATACCTTAGTGGTACAGCTGGCAGCACTCACAGCAGCCACTCCGTCAATCACTCAGGTTACGGTTAGGCTGTTCCTTAAC CAGTAC GAGACC AAG
Table S7. Primers used for tiles creation of (truncated) RBPs fusion with GFP, together with tile sequence. In the primers to the sequence of interest following features were added: SapI recognition site (NNN GCTCTTC N); overhangs to insert sequence into pVTE entry vector for tiles creation (AGA or CTT); BsaI recognition site (GGTCTC); six-nucleotide-long position marker (PM) for VersaTile reacti…
Tile name	Primer FOR name	Primer sequence	Primer REV name	Primer sequence	Total tile sequence
GFP PS PE	GFP PS FOR	ATA GCTCTTCC AGA GGTCTC ACCATG AGCAAGGGCGAGGAG	GFP PE REV	ATA GCTCTTCC CTT GGTCTC GTACTG ACCCTTCTTGTACAGCTCG	AGA GGTCTC ACCATG AGCAAGGGCGAGGAGCTGTTCACCGGGGTGGTGCCCATCCTGGTCGAGCTGGACGGCGACGTAAACGGCCACAAGTTCAGCGTGTCCGGCGAGGGCGAGGGCGATGCCACCTACGGCAAGCTGACCCTGAAGTTCATCTGCACCACCGGCAAGCTGCCCGTGCCCTGGCCCACCCTCGTGACCACCCTGACCTACGGCGTGCAGTGCTTCAGCCGCTACCCCGACCACATGAAGCAGCACGACTTCTTCAAGTCCGCCATGCCCGAAGGCTACGTCCAGGAGCGCACCATCTTCTTCAAGGACGACGGCAACTACAAGACCCGCGCCGAGGTGAAGTTCGAGGGCGACACCCTGGTGAACCGCATCGAGCTGAAGGGCATC…
GFP PS PM	GFP PS FOR	ATA GCTCTTCC AGA GGTCTC ACCATG AGCAAGGGCGAGGAG	GFP PM REV	ATA GCTCTTCC CTT GGTCTC ACTACC ACCCTTCTTGTACAGCTCG	AGA GGTCTC ACCATG AGCAAGGGCGAGGAGCTGTTCACCGGGGTGGTGCCCATCCTGGTCGAGCTGGACGGCGACGTAAACGGCCACAAGTTCAGCGTGTCCGGCGAGGGCGAGGGCGATGCCACCTACGGCAAGCTGACCCTGAAGTTCATCTGCACCACCGGCAAGCTGCCCGTGCCCTGGCCCACCCTCGTGACCACCCTGACCTACGGCGTGCAGTGCTTCAGCCGCTACCCCGACCACATGAAGCAGCACGACTTCTTCAAGTCCGCCATGCCCGAAGGCTACGTCCAGGAGCGCACCATCTTCTTCAAGGACGACGGCAACTACAAGACCCGCGCCGAGGTGAAGTTCGAGGGCGACACCCTGGTGAACCGCATCGAGCTGAAGGGCATC…
KP32gp38_CP-E_mut (1-360) PM PE	KP32gp38 ConPep1 PM FOR	ATA GCTCTTCC AGA GGTCTC GGTAGT TTAGACAATTTCAATCAGCCGAAAG	KP32gp38Enz360 P E REV	ATA GCTCTTCC CTT GGTCTC TTACTG CTGGCCCACCGAGACGTTACCATTCGAC	AGA GGTCTC GGTAGT TTAGACAATTTCAATCAGCCGAAAGGCTCAACCATTGGTGTGCTCAAGGATGGGCGCACTATCCAAGAGGCATTCGACTCATTACCGCGCCTTGAGTCCTTCTCTGGGTCCACGGCAACCGACAAGCTACGCGCAGCCATCACCTTAGGTGTATCTGAGGTCGCCATCGGTCCTGTTGAAGGTAACGGCGGAAGGCCTTATGAGTTCGGGGATGTAGTCATTCCGTATCCTCTGCGTATTGTAGGTTGTGGTTCTCAAGGTATCAACGTTACCAAGGGAACAGTCCTCAAGCGTTCTGCGGGTGCATCCTTCATGTTCCACTTCACGGGCGAGGGACAAGCTCAGCGTCCTATGGGCGGTGGGTTGTTTAACATCAACCTG…
KP32gp38_mut PM PE	KP32gp38 ConPep1 PM FOR	ATA GCTCTTCC AGA GGTCTC GGTAGT TTAGACAATTTCAATCAGCCGAAAG	KP32gp38LEC576 PE REV	ATA GCTCTTCC CTT GGTCTC GTACTG TGATACGAATGCCCTTACTCGGCATCG	AGA GGTCTC GGTAGT TTAGACAATTTCAATCAGCCGAAAGGCTCAACCATTGGTGTGCTCAAGGATGGGCGCACTATCCAAGAGGCATTCGACTCATTACCGCGCCTTGAGTCC TTCTCTGGGTCCACGGCAACCGACAAGCTACGCGCAGCCATCACCTTAGGTGTATCTGAGGTCGCCATCGGTCCTGTTGAAGGTAACGGCGGAAGGCCTTATGAGTTCGGGGATGTAGTCATTCCGTATCCTCTGCGTATTGTAGGTTGTGGTTCTCAAGGTATCAACGTTACCAAGGGAACAGTCCTCAAGCGTTCTGCGGGTGCATCCTTCATGTTCCACTTCACGGGCGAGGGACAAGCTCAGCGTCCTATGGGCGGTGGGTTGTTTAACATCAACCT…
KP32gp38_WT PM PE	KP32gp38 ConPep1 PM FOR	ATA GCTCTTCC AGA GGTCTC GGTAGT TTAGACAATTTCAATCAGCCGAAAG	KP32gp38LEC576 PE REV	ATA GCTCTTCC CTT GGTCTC GTACTG TGATACGAATGCCCTTACTCGGCATCG	AGA GGTCTC GGTAGT TTAGACAATTTCAATCAGCCGAAAGGCTCAACCATTGGTGTGCTCAAGGATGGGCGCACTATCCAAGAGGCATTCGACTCATTACCGCGCCTTGAGTCC TTCTCTGGGTCCACGGCAACCGACAAGCTACGCGCAGCCATCACCTTAGGTGTATCTGAGGTCGCCATCGGTCCTGTTGAAGGTAACGGCGGAAGGCCTTATGAGTTCGGGGATGTAGTCATTCCGTATCCTCTGCGTATTGTAGGTTGTGGTTCTCAAGGTATCAACGTTACCAAGGGAACAGTCCTCAAGCGTTCTGCGGGTGCATCCTTCATGTTCCACTTCACGGGCGAGGGACAAGCTCAGCGTCCTATGGGCGGTGGGTTGTTTAACATCAACCT…
KP32gp38_LEC (488-576) PM PE	KP32gp38LEC488 PM FOR	ATA GCTCTTCC AGA GGTCTC GGTAGT GATTATATTGACTGGGACTTCGCAATAG	KP32gp38LEC576 PE REV	ATA GCTCTTCC CTT GGTCTC GTACTG TGATACGAATGCCCTTACTCGGCATCG	AGA GGTCTC GGTAGT GATTATATTGACTGGGACTTCGCAATAGCCCCCGGTACACTAGCTGCTGGTGCCAAGTATACAACACCTAACCAGTCGTACCTAGATGTTGCTGGGATGCGCGTTCAGGCCGTTAGTATTCCAATGTTCGACGGACCAACAACAGGGTTGCAGGTCTGGGTTGAAGCAACCAGCGCCAACGGTTCGTTTGTTGTTGTCATGAAGAACGACACAGGGTCTGAGCTGGTGACCACAGTAACACGATGCCGAGTAAGGGCATTCGTATCA CAGTAC GAGACC AAG
KP32gp38_CBM-LEC (361-576) PM PE	KP32gp38CBM361 PM FOR	ATA GCTCTTCC AGA GGTCTC GGTAGT CAGATTCTCCCCGATGGTTACATCAAC	KP32gp38LEC576 PE REV	ATA GCTCTTCC CTT GGTCTC GTACTG TGATACGAATGCCCTTACTCGGCATCG	AGA GGTCTC GGTAGT CAGATTCTCCCCGATGGTTACATCAACATGGCGGAGCTTCCGGGCAACACCCGGCTACCTTCGGAGTACGATGCAGACGGTGAGACAACTTCGGTGTTGCGTGTACCAGCTAACACTCAGGTGCGCCAGTGGTCCGTCCCTAAGATGTATAAGGATGGACTTACCGTGACCAAGGTCACTGTACGGGCCAAGGGTGCAGCGGCTGGTGCTATCCTCTCGTTGCAGAGCGGCTCAACCGTATTATCCACCAAGTCTATTGACGCTGGGGTGTGGAAGAACTACGTGTTCTACGTGAAGGCAAACCAATTGCAGGAAACATTGCAGCTCCGCAATACTGGCACTGCTGATGTTCTAGCTGATGGTATGGTGTTTGGAAAGGTT…
KP32gp38_LIN-CBM (361-487) PM-PE	KP32gp38CBM361 PM FOR	ATA GCTCTTCC AGA GGTCTC GGTAGT CAGATTCTCCCCGATGGTTACATCAAC	KP32gp38CBM487 PE REV	ATA GCTCTTCC CTT GGTCTC GTACTG AACCTTTCCAAACACCATACCATC	AGA GGTCTC GGTAGT CAGATTCTCCCCGATGGTTACATCAACATGGCGGAGCTTCCGGGCAACACCCGGCTACCTTCGGAGTACGATGCAGACGGTGAGACAACTTCGGTGTTGCGTGTACCAGCTAACACTCAGGTGCGCCAGTGGTCCGTCCCTAAGATGTATAAGGATGGACTTACCGTGACCAAGGTCACTGTACGGGCCAAGGGTGCAGCGGCTGGTGCTATCCTCTCGTTGCAGAGCGGCTCAACCGTATTATCCACCAAGTCTATTGACGCTGGGGTGTGGAAGAACTACGTGTTCTACGTGAAGGCAAACCAATTGCAGGAAACATTGCAGCTCCGCAATACTGGCACTGCTGATGTTCTAGCTGATGGTATGGTGTTTGGAAAGGTT…
KP32gp38_CBM-LEC (380-576) PM PE	KP32gp38 CBM 380 PM FOR	ATA GCTCTTCA AGA GGTCTC GGTAGT CCTTCGGAGTACGATGCAGACGGTG	KP32gp38LEC576 PE REV	ATA GCTCTTCC CTT GGTCTC GTACTG TGATACGAATGCCCTTACTCGGCATCG	AGA GGTCTC GGTAGT CCTTCGGAGTACGATGCAGACGGTGAGACAACTTCGGTGTTGCGTGTACCAGC TAACACTCAGGTGCGCCAGTGGTCCGTCCCTAAGATGTATAAGGATGGACTTACCGTGACCAAGGTCACT GTACGGGCCAAGGGTGCAGCGGCTGGTGCTATCCTCTCGTTGCAGAGCGGCTCAACCGTATTATCCACCA AGTCTATTGACGCTGGGGTGTGGAAGAACTACGTGTTCTACGTGAAGGCAAACCAATTGCAGGAAACATT GCAGCTCCGCAATACTGGCACTGCTGATGTTCTAGCTGATGGTATGGTGTTTGGAAAGGTT GATTATATT GACTGGGACTTCGCAATAGCCCCCGGTACACTAGCTGCTGGT…

## Sheet: T S8
Table S8. Primers used for tiles creation to assamble RBPs gene cluster of engineered phages (ePs), together with tile sequence. In the primers to the sequence of interest following features were added: SapI recognition site (NNN GCTCTTC N); overhangs to insert sequence into pVTE entry vector for tiles creation (AGA or CTT); BsaI recognition site (GGTCTC); six-nucleotide-long position marker (PM)…
Tile name	Tile explanation	Primer FOR sequence	Primer REV name	Primer REV sequence	Total tile sequence
Start_P1P2_KP32	KP32 bp 33238-33422 (before gp37)	ATA GCTCTTCC AGA GGTCTC TGACTG GCACCTAATAAGCCGACTGAGCGTG	phageScaffoldKP32_R	ATA GCTCTTCC CTT GGTCTC CATGGT GACCTCCTTAAGTTGAATAGGAG	AGA GGTCTC TGACTG GCCTGATGAACTCCACAAAGGAGCTTGTGCCAAACGACCCGCTTACCCAACAGCTAATCATGAAAATCTATGAAGCTAATGGTGTCACCATAAAGCAGCAGCCTAGACCCAACTAATTAGGGCACACTATAGGGAGGCCGACTGGTTTCCCTCCTATTCAACTTAAGGAGGTC ACCATG GAGACC AAG
RBP_P2P5_2	KP32gp37AE_2/869	GTG GCTCTTCC AGA GGTCTC ACCATG GACCAAGATATTAAAACAATCATTCAGTAC	RBP1_KP32_R	ATA GCTCTTCC CTT GGTCTC TTCTCC TTATTTGTAGGTCAGGCCGAG	AGA GGTCTC ACCATG GACCAAGATATTAAAACAATCATTCAGTACCCAACAGGAGCCACTGAGTTTGACATCCCGTTTGACTACCTGTCCCGCAAGTTTGTCCGCGTGTCTCTGGTATCGGACGACAACCGCCGACTCTTGCGCAACATCACGGAGTACCGTTACGTGTCGAAGACTCGCGTTAAGATTCTGGTGGACACCACTGGGTTCGACCGAGTTGAAATCCGACGGTTCACCTCAGCGTCTGAACGTGTTGTGGACTTCAGTGATGGCTCTGTGCTCCGCGCTAACGACCTAAACGTGTCCCAGCTACAGTCTTCACATATTGCCGAAGAGGCCCGTGACAGTGCGCTTCTGGCCATGCCTGAGGATGATGCTGGTAACCTCGACGCGAGA…
RBP_P5P7_3	KP32gp38CPEnzLinCBM_1/487	ATA GCTCTTCC AGA GGTCTC GGAGAA CCTCATGTTAGACAATTTCAATCAGCCGAAAG	KP32noLEC 37500 P7 REV	ATA GCTCTTCC CTT GGTCTC ATTACC TCCTTAAACCTTTCCAAACACCATACCATCAG	AGA GGTCTC GGAGAA CCTCATGTTAGACAATTTCAATCAGCCGAAAGGCTCAACCATTGGTGTGCTCAAGGATGGGCGCACTATCCAAGAGGCATTCGACTCATTACCGCGCCTTGAGTCCTTCTCTGGGTCCACGGCAACCGACAAGCTACGCGCAGCCATCACCTTAGGTGTATCTGAGGTCGCCATCGGTCCTGTTGAAGGTAACGGCGGAAGGCCTTATGAGTTCGGGGATGTAGTCATTCCGTATCCTCTGCGTATTGTAGGTTGTGGTTCTCAAGGTATCAACGTTACCAAGGGAACAGTCCTCAAGCGTTCTGCGGGTGCATCCTTCATGTTCCACTTCACGGGCGAGGGACAAGCTCAGCGTCCTATGGGCGGTGGGTTGTTTAACAT…
End_P7P8_KP32	KP32 bp 37774-37968 (after gp38)	ATA GCTCTTCC AGA GGTCTC GGTAAT ATGTTGTCCCTAGACTTCAATAAC	KP32scaf 37963 P8 REV	ATA GCTCTTCC CTT GGTCTC TTTCTT CCAGTCAATGATTTTATCGACTAC	AGA GGTCTC GGTAAT ATGTTGTCCCTAGACTTCAATAACGAAGTTATCAAGGCGGCTCCCATTGCGGGTGTCGCTGGGGCCGATGGTGTAGCGAGGCTCTTCTGGGGCCTCTCACTCAACGAGTGGTTCTACGTCGCGGCAATCGCCTACACAGTGGTTCAGATTGGTGCCAAGGTAGTCGATAAAATCATTGACTGG AAGAAA GAGACC AAG
RBP_P5P7_5	KP32gp38CPEnzLin_1/379	ATA GCTCTTCA AGA GGTCTC GGAGAA CCTATGTTAGACAATTTCAATCAGCCGAAAG	KP32gp38noCBMLEC 37176 P7 REV	ATA GCTCTTCA CTT GGTCTC ATTACC TCCTTATAGCCGGGTGTTGCCCGGAAGCTC	AGA GGTCTC GGAGAA CCTCATGTTAGACAATTTCAATCAGCCGAAAGGCTCAACCATTGGTGTGCTCAAGGATGGGCGCACTATCCAAGAGGCATTCGACTCATTACCGCGCCTTGAGTCCTTCTCTGGGTCCACGGCAACCGACAAGCTACGCGCAGCCATCACCTTAGGTGTATCTGAGGTCGCCATCGGTCCTGTTGAAGGTAACGGCGGAAGGCCTTATGAGTTCGGGGATGTAGTCATTCCGTATCCTCTGCGTATTGTAGGTTGTGGTTCTCAAGGTATCAACGTTACCAAGGGAACAGTCCTCAAGCGTTCTGCGGGTGCATCCTTCATGTTCCACTTCACGGGCGAGGGACAAGCTCAGCGTCCTATGGGCGGTGGGTTGTTTAACAT…
RBP_P5P7_6	KP32gp38CPEnz_1/360	ATA GCTCTTCA AGA GGTCTC GGAGAA CCTCATGTTAGACAATTTCAATCAGCCGAAAG	KP32gp38noCBMLEC 37119 P7 REV	ATA GCTCTTCA CTT GGTCTC ATTACC TCCTTACTGGCCCACCGAGACGTTACCATTCGAC	AGA GGTCTC GGAGAA CCTCATGTTAGACAATTTCAATCAGCCGAAAGGCTCAACCATTGGTGTGCTCAAGGATGGGCGCACTATCCAAGAGGCATTCGACTCATTACCGCGCCTTGAGTCCTTCTCTGGGTCCACGGCAACCGACAAGCTACGCGCAGCCATCACCTTAGGTGTATCTGAGGTCGCCATCGGTCCTGTTGAAGGTAACGGCGGAAGGCCTTATGAGTTCGGGGATGTAGTCATTCCGTATCCTCTGCGTATTGTAGGTTGTGGTTCTCAAGGTATCAACGTTACCAAGGGAACAGTCCTCAAGCGTTCTGCGGGTGCATCCTTCATGTTCCACTTCACGGGCGAGGGACAAGCTCAGCGTCCTATGGGCGGTGGGTTGTTTAACAT…
RBP_P5P9_1	KP32gp38CPEnzLin_1/379	ATA GCTCTTCA AGA GGTCTC GGAGAA CCTCATGTTAGACAATTTCAATCAGCCGAAAG	KP32gp38Lin379 P9 REV	ATA GCTCTTCA CTT GGTCTC ACTACC TAGCCGGGTGTTGCCCGGAAG	AGA GGTCTC GGAGAA CCTCATGTTAGACAATTTCAATCAGCCGAAAGGCTCAACCATTGGTGTGCTCAAGGATGGGCGCACTATCCAAGAGGCATTCGACTCATTACCGCGCCTTGAGTCCTTCTCTGGGTCCACGGCAACCGACAAGCTACGCGCAGCCATCACCTTAGGTGTATCTGAGGTCGCCATCGGTCCTGTTGAAGGTAACGGCGGAAGGCCTTATGAGTTCGGGGATGTAGTCATTCCGTATCCTCTGCGTATTGTAGGTTGTGGTTCTCAAGGTATCAACGTTACCAAGGGAACAGTCCTCAAGCGTTCTGCGGGTGCATCCTTCATGTTCCACTTCACGGGCGAGGGACAAGCTCAGCGTCCTATGGGCGGTGGGTTGTTTAACAT…
LEC_P9P7_1	KP32gp38 LEC_488/577	ATA GCTCTTCC AGA GGTCTC GGTAGT GATTATATTGACTGGGACTTCGCAATAG	KP32gp38 LEC576 P7 REV	GTA GCTCTTCA CTT GGTCTC ATTACC TCCTTATGATACGAATGCCCTTACTCG	AGA GGTCTC GGTAGT GATTATATTGACTGGGACTTCGCAATAGCCCCCGGTACACTAGCTGCTGGTGCCAAGTATACAACACCTAACCAGTCGTACCTAGATGTTGCTGGGATGCGCGTTCAGGCCGTTAGTATTCCAATGTTCGACGGACCAACAACAGGGTTGCAGGTCTGGGTTGAAGCAACCAGCGCCAACGGTTCGTTTGTTGTTGTCATGAAGAACGACACAGGGTCTGAGCTGGTGACCACAGTAACACGATGCCGAGTAAGGGCATTCGTATCATAAGGA GGTAAT GAGACC AAG
RBP_P5P9_2	KP32gp38CPEnz_1/360	ATA GCTCTTCA AGA GGTCTC GGAGAA CCTCATGTTAGACAATTTCAATCAGCCGAAAG	KP32gp38Enz360 P9 REV	ATA GCTCTTCC CTT GGTCTC ACTACC CTGGCCCACCGAGACGTTACCATTCGAC	AGA GGTCTC GGAGAA CCTCATGTTAGACAATTTCAATCAGCCGAAAGGCTCAACCATTGGTGTGCTCAAGGATGGGCGCACTATCCAAGAGGCATTCGACTCATTACCGCGCCTTGAGTCCTTCTCTGGGTCCACGGCAACCGACAAGCTACGCGCAGCCATCACCTTAGGTGTATCTGAGGTCGCCATCGGTCCTGTTGAAGGTAACGGCGGAAGGCCTTATGAGTTCGGGGATGTAGTCATTCCGTATCCTCTGCGTATTGTAGGTTGTGGTTCTCAAGGTATCAACGTTACCAAGGGAACAGTCCTCAAGCGTTCTGCGGGTGCATCCTTCATGTTCCACTTCACGGGCGAGGGACAAGCTCAGCGTCCTATGGGCGGTGGGTTGTTTAACAT…
LEC_P9P7_1	KP32gp38 LEC_488/577	ATA GCTCTTCC AGA GGTCTC GGTAGT GATTATATTGACTGGGACTTCGCAATAG	KP32gp38 LEC576 P7 REV	GTA GCTCTTCA CTT GGTCTC ATTACC TCCTTATGATACGAATGCCCTTACTCG	AGA GGTCTC GGTAGT GATTATATTGACTGGGACTTCGCAATAGCCCCCGGTACACTAGCTGCTGGTGCCAAGTATACAACACCTAACCAGTCGTACCTAGATGTTGCTGGGATGCGCGTTCAGGCCGTTAGTATTCCAATGTTCGACGGACCAACAACAGGGTTGCAGGTCTGGGTTGAAGCAACCAGCGCCAACGGTTCGTTTGTTGTTGTCATGAAGAACGACACAGGGTCTGAGCTGGTGACCACAGTAACACGATGCCGAGTAAGGGCATTCGTATCATAAGGA GGTAAT GAGACC AAG
RBP_P2P7_1	KP32gp37whole_1/870	GTG GCTCTTCC AGA GGTCTC ACCATG GACCAAGATATTAAAACAATCATTCAGTAC	KP32gp37 Chap869 P7 REV	ATA GCTCTTCA CTT GGTCTC ATTACC TCCTTATTTGTAGGTCAGGCCGAGCTTAC	AGA GGTCTC ACCATG GACCAAGATATTAAAACAATCATTCAGTACCCAACAGGAGCCACTGAGTTTGACATCCCGTTTGACTACCTGTCCCGCAAGTTTGTCCGCGTGTCTCTGGTATCGGACGACAACCGCCGACTCTTGCGCAACATCACGGAGTACCGTTACGTGTCGAAGACTCGCGTTAAGATTCTGGTGGACACCACTGGGTTCGACCGAGTTGAAATCCGACGGTTCACCTCAGCGTCTGAACGTGTTGTGGACTTCAGTGATGGCTCTGTGCTCCGCGCTAACGACCTAAACGTGTCCCAGCTACAGTCTTCACATATTGCCGAAGAGGCCCGTGACAGTGCGCTTCTGGCCATGCCTGAGGATGATGCTGGTAACCTCGACGCGAGA…

## Sheet: T S9
Table S9. Primers for colony PCR, Sanger sequencing and site-directed mutagenesis.
Explanation	Primer name	Primer sequence
Colony PCR and sequencing of pVTSD3	T7_promoter_F	TAATACGACTCACTATAGGG
	T7_terminal_primer_R	TAGTTATTGCTCAGCGGTGG
Colony PCR and sequencing of pVTSEIII	pVTSEIII-F	TCTTTCCTGCGTTATCCC
	pVTSEIII-R	CATGAGCGGATACATATTTG
Colony PCR and sequencing	KP32gp37_745-764	GCATCCTGTGCCGTAACACC
	KP34p57_742-758	GGTCGGTAGTGTACGGC
	KP36gp50_861-878	GCCCCTCACATTCAAGCC
	K11gp17_881-901	CTACCATCCTGCGCAACATTG
	32gp38_F	ATGTTAGACAATTTCAATCAGCCG
	K11gp17_683-702	GTTACCACTACTCTTACGAC
	KP32gp38_244-262	GTAGGTTGTGGTTCTCAAG
	KP34gp57_276-294	GTTTATGGCTGGCAGTATC
	KP32gp37 33889 seq FOR	CTGGTGGTATTCTGTCTGAG
	KP32gp38 36211 seq REV	GATGGCGACCTCAGATACAC
	KP32gp38 seq 37239 REV	CTGAGTGTTAGCTGGTACAC
	KP32 33908 REV	CTCAGACAGAATACCACCAG
Site directed mutagenesis to introduce mutation E170Q	KP32gp38 E170Q FOR	GTATTCGACTGAAAGATGTAATGCAGTCGAACATCTCGGGGAAC
	KP32gp38 E170Q REV	GAATAAGTTCCCCGAGATGTTCGACTGCATTACATCTTTCAGTC
Site directed mutagenesis to introduce mutation E239Q-D241N	KP32gp38 E239Q-D241N FOR	GATTTGGATTGTCCGCAATAAGTTCCAATTTAATGGCACCCCGGCGGCTC
	KP32gp38 E239Q-D241N REV	GTGTTCGGAGCCGCCGGGGTGCCATTAAATTGGAACTTATTGCGGACAATC

## Sheet: T S10
Table S10. Tile composition of truncated, chimeric and GFP-fused RBPs together with total construct sequence. Tiles are listed in Tables S4-6.
Construct name in pVTD3 vector	Tile 1	Tile 2	Total construct sequence
KP32gp38_WT (1-576)	KP32gp38_WT (1-576) PS PE	-	ACCATG TTAGACAATTTCAATCAGCCGAAAGGCTCAACCATTGGTGTGCTCAAGGATGGGCGCACTATCCAAGAGGCATTCGACTCATTACCGCGCCTTGAGTCCTTCTCTGGGTCCACGGCAACCGACAAGCTACGCGCAGCCATCACCTTAGGTGTATCTGAGGTCGCCATCGGTCCTGTTGAAGGTAACGGCGGAAGGCCTTATGAGTTCGGGGATGTAGTCATTCCGTATCCTCTGCGTATTGTAGGTTGTGGTTCTCAAGGTATCAACGTTACCAAGGGAACAGTCCTCAAGCGTTCTGCGGGTGCATCCTTCATGTTCCACTTCACGGGCGAGGGACAAGCTCAGCGTCCTATGGGCGGTGGGTTGTTTAACATCAACCTGAATGGGGACAC…
KP32gp38_ΔCP (30-576)	KP32gp38_ΔCP (30-576) PS PE	-	ACCATG CCGCGCCTTGAGTCCTTCTCTGGGTCCACGGCAACCGACAAGCTACGCGCAGC CATCACCTTAGGTGTATCTGAGGTCGCCATCGGTCCTGTTGAAGGTAACGGCGGAAGGCCTTATGAGTTC GGGGATGTAGTCATTCCGTATCCTCTGCGTATTGTAGGTTGTGGTTCTCAAGGTATCAACGTTACCAAGG GAACAGTCCTCAAGCGTTCTGCGGGTGCATCCTTCATGTTCCACTTCACGGGCGAGGGACAAGCTCAGCG TCCTATGGGCGGTGGGTTGTTTAACATCAACCTGAATGGGGACACAGCGACAGCTCTGGGAGACATAATC AAGGTTACGCAGTGGTCTTACTTCAAGGCTAATAACTGCGCGTTCCAGAACATG…
KP32gp38_ΔLEC (1-487)	KP32gp38_ΔLEC (1-487) PS PE	-	ACCATG TTAGACAATTTCAATCAGCCGAAAGGCTCAACCATTGGTGTGCTCAAGGATGGGCGCACTATCCAAGAGGCATTCGACTCATTACCGCGCCTTGAGTCC TTCTCTGGGTCCACGGCAACCGACAAGCTACGCGCAGCCATCACCTTAGGTGTATCTGAGGTCGCCATCGGTCCTGTTGAAGGTAACGGCGGAAGGCCTTATGAGTTCGGGGATGTAGTCATTCCGTATCCTCTGCGTATTGTAGGTTGTGGTTCTCAAGGTATCAACGTTACCAAGGGAACAGTCCTCAAGCGTTCTGCGGGTGCATCCTTCATGTTCCACTTCACGGGCGAGGGACAAGCTCAGCGTCCTATGGGCGGTGGGTTGTTTAACATCAACCTGAATGGGGACA…
KP32gp38_Δ(CP-LEC) (30-487)	KP32gp38_Δ(CP-LEC) (30-487) PS PE	-	ACCATG CCGCGCCTTGAG TCCTTCTCTGGGTCCACGGCAACCGACAAGCTACGCGCAGC CATCACCTTAGGTGTATCTGAGGTCGCCATCGGTCCTGTTGAAGGTAACGGCGGAAGGCCTTATGAGTTC GGGGATGTAGTCATTCCGTATCCTCTGCGTATTGTAGGTTGTGGTTCTCAAGGTATCAACGTTACCAAGG GAACAGTCCTCAAGCGTTCTGCGGGTGCATCCTTCATGTTCCACTTCACGGGCGAGGGACAAGCTCAGCG TCCTATGGGCGGTGGGTTGTTTAACATCAACCTGAATGGGGACACAGCGACAGCTCTGGGAGACATAATC AAGGTTACGCAGTGGTCTTACTTCAAGGCTAATAACTGCGCGTTCCAGAACAT…
KP32gp38_ΔCBM (1-379_488-576)	KP32gp38_CP-E (1-360) PS PM	Kp32gp38_LEC (488-576) PM PE	ACCATG TTAGACAATTTCAATCAGCCGAAAGGCTCAACCATTGGTGTGCTCAAGGATGGGCGCACTATCCAAGAGGCATTCGACTCATTACCGCGCCTTGAGTCCTTCTCTGGGTCCACGGCAACCGACAAGCTACGCGCAGCCATCACCTTAGGTGTATCTGAGGTCGCCATCGGTCCTGTTGAAGGTAACGGCGGAAGGCCTTATGAGTTCGGGGATGTAGTCATTCCGTATCCTCTGCGTATTGTAGGTTGTGGTTCTCAAGGTATCAACGTTACCAAGGGAACAGTCCTCAAGCGTTCTGCGGGTGCATCCTTCATGTTCCACTTCACGGGCGAGGGACAAGCTCAGCGTCCTATGGGCGGTGGGTTGTTTAACATCAACCTGAATGGGGACAC…
KP32gp38_Δ(LIN-CBM) (1-360_488-576)	KP32gp38_CP-E-LIN (1-379) PS PM	Kp32gp38_LEC (488-576) PM PE	ACCATG TTAGACAATTTCAATCAGCCGAAAGGCTCAACCATTGGTGTGCTCAAGGATGGGCGCACTATCCAAGAGGCATTCGACTCATTACCGCGCCTTGAGTCC TTCTCTGGGTCCACGGCAACCGACAAGCTACGCGCAGCCATCACCTTAGGTGTATCTGAGGTCGCCATCGGTCCTGTTGAAGGTAACGGCGGAAGGCCTTATGAGTTCGGGGATGTAGTCATTCCGTATCCTCTGCGTATTGTAGGTTGTGGTTCTCAAGGTATCAACGTTACCAAGGGAACAGTCCTCAAGCGTTCTGCGGGTGCATCCTTCATGTTCCACTTCACGGGCGAGGGACAAGCTCAGCGTCCTATGGGCGGTGGGTTGTTTAACATCAACCTGAATGGGGACA…
KP32gp38_ Δ(CBM-LEC) (1-379)	KP32gp38_ Δ(CBM-LEC) (1-379) PS PE	-	ACCATG TTAGACAATTTCAATCAGCCGAAAGGCTCAACCATTGGTGTGCTCAAGGATGGGCGCACTATCCAAGAGGCATTCGACTCATTACCGCGCCTTGAGTCCTTCTCTGGGTCCACGGCAACCGACAAGCTACGCGCAGCCATCACCTTAGGTGTATCTGAGGTCGCCATCGGTCCTGTTGAAGGTAACGGCGGAAGGCCTTATGAGTTCGGGGATGTAGTCATTCCGTATCCTCTGCGTATTGTAGGTTGTGGTTCTCAAGGTATCAACGTTACCAAGGGAACAGTCCTCAAGCGTTCTGCGGGTGCATCCTTCATGTTCCACTTCACGGGCGAGGGACAAGCTCAGCGTCCTATGGGCGGTGGGTTGTTTAACATCAACCTGAATGGGGACAC…
KP32gp38_ Δ(CP-CBM-LEC) (30-379)	KP32gp38_ Δ(CP-CBM-LEC) (30-379) PS PE	-	ACCATG CCGCGCCTTGAGTCCTTCTCTGGGTCCACGGCAACCGACAAGCTACGCGCAGC CATCACCTTAGGTGTATCTGAGGTCGCCATCGGTCCTGTTGAAGGTAACGGCGGAAGGCCTTATGAGTTC GGGGATGTAGTCATTCCGTATCCTCTGCGTATTGTAGGTTGTGGTTCTCAAGGTATCAACGTTACCAAGG GAACAGTCCTCAAGCGTTCTGCGGGTGCATCCTTCATGTTCCACTTCACGGGCGAGGGACAAGCTCAGCG TCCTATGGGCGGTGGGTTGTTTAACATCAACCTGAATGGGGACACAGCGACAGCTCTGGGAGACATAATC AAGGTTACGCAGTGGTCTTACTTCAAGGCTAATAACTGCGCGTTCCAGAACATG…
KP32gp88_CP-E (1-360)	KP32gp88_CP-E (1-360) PS PE	-	ACCATG TTAGACAATTTCAATCAGCCGAAAGGCTCAACCATTGGTGTGCTCAAGGATGGGCGCACTATCCAAGAGGCATTCGACTCATTACCGCGCCTTGAGTCC TTCTCTGGGTCCACGGCAACCGACAAGCTACGCGCAGCCATCACCTTAGGTGTATCTGAGGTCGCCATCGGTCCTGTTGAAGGTAACGGCGGAAGGCCTTATGAGTTCGGGGATGTAGTCATTCCGTATCCTCTGCGTATTGTAGGTTGTGGTTCTCAAGGTATCAACGTTACCAAGGGAACAGTCCTCAAGCGTTCTGCGGGTGCATCCTTCATGTTCCACTTCACGGGCGAGGGACAAGCTCAGCGTCCTATGGGCGGTGGGTTGTTTAACATCAACCTGAATGGGGACA…
KP32gp38_E (30-360)	KP32gp38_E (30-360) PS PE	-	ACCATG CCGCGCCTTGAG TCCTTCTCTGGGTCCACGGCAACCGACAAGCTACGCGCAGC CATCACCTTAGGTGTATCTGAGGTCGCCATCGGTCCTGTTGAAGGTAACGGCGGAAGGCCTTATGAGTTC GGGGATGTAGTCATTCCGTATCCTCTGCGTATTGTAGGTTGTGGTTCTCAAGGTATCAACGTTACCAAGG GAACAGTCCTCAAGCGTTCTGCGGGTGCATCCTTCATGTTCCACTTCACGGGCGAGGGACAAGCTCAGCG TCCTATGGGCGGTGGGTTGTTTAACATCAACCTGAATGGGGACACAGCGACAGCTCTGGGAGACATAATC AAGGTTACGCAGTGGTCTTACTTCAAGGCTAATAACTGCGCGTTCCAGAACAT…
KP32gp38_LIN-CBM-LEC (361-576)	KP32gp38_LIN-CBM-LEC (361-576) PS PE	-	ACCATG CAGATTCTCCCCGATGGTTACATCAACATGGCGGAGCTTCCGGGCAACACCCGGCTACCTTCGGAGTACGATGCAGACGGTGAGACAACTTCGGTGTTGCGTGTACCAGCTAACACTCAGGTGCGCCAGTGGTCCGTCCCTAAGATGTATAAGGATGGACTTACCGTGACCAAGGTCACTGTACGGGCCAAGGGTGCAGCGGCTGGTGCTATCCTCTCGTTGCAGAGCGGCTCAACCGTATTATCCACCAAGTCTATTGACGCTGGGGTGTGGAAGAACTACGTGTTCTACGTGAAGGCAAACCAATTGCAGGAAACATTGCAGCTCCGCAATACTGGCACTGCTGATGTTCTAGCTGATGGTATGGTGTTTGGAAAGGTTGATTATATTGA…
KP32gp38_CBM-LEC (380-576)	KP32gp38_CBM-LEC (380-576) PS PE	-	ACCATG CCTTCGGAGTACGATGCAGACGGTGAGACAACTTCGGTGTTGCGTGTACCAGC TAACACTCAGGTGCGCCAGTGGTCCGTCCCTAAGATGTATAAGGATGGACTTACCGTGACCAAGGTCACT GTACGGGCCAAGGGTGCAGCGGCTGGTGCTATCCTCTCGTTGCAGAGCGGCTCAACCGTATTATCCACCA AGTCTATTGACGCTGGGGTGTGGAAGAACTACGTGTTCTACGTGAAGGCAAACCAATTGCAGGAAACATT GCAGCTCCGCAATACTGGCACTGCTGATGTTCTAGCTGATGGTATGGTGTTTGGAAAGGTT GATTATATT GACTGGGACTTCGCAATAGCCCCCGGTACACTAGCTGCTGGTGCCAAGTATAC…
KP32gp38_LIN-CBM (361-487)	KP32gp38_LIN-CBM (361-487) PS PE	-	ACCATG CAGATTCTCCCCGATGGTTACATCAACATGGCGGAGCTTCCGGGCAACACCCGGCTACCTTCGGAGTACGATGCAGACGGTGAGACAACTTCGGTGTTGCGTGTACCAGCTAACACTCAGGTGCGCCAGTGGTCCGTCCCTAAGATGTATAAGGATGGACTTACCGTGACCAAGGTCACTGTACGGGCCAAGGGTGCAGCGGCTGGTGCTATCCTCTCGTTGCAGAGCGGCTCAACCGTATTATCCACCAAGTCTATTGACGCTGGGGTGTGGAAGAACTACGTGTTCTACGTGAAGGCAAACCAATTGCAGGAAACATTGCAGCTCCGCAATACTGGCACTGCTGATGTTCTAGCTGATGGTATGGTGTTTGGAAAGGTT CAGTAC
KP32gp38_CBM (380-487)	KP32gp38_CBM (380-487) PS PE	-	ACCATG CCTTCGGAGTACGATGCAGACGGTGAGACAACTTCGGTGTTGCGTGTACCAGC TAACACTCAGGTGCGCCAGTGGTCCGTCCCTAAGATGTATAAGGATGGACTTACCGTGACCAAGGTCACT GTACGGGCCAAGGGTGCAGCGGCTGGTGCTATCCTCTCGTTGCAGAGCGGCTCAACCGTATTATCCACCA AGTCTATTGACGCTGGGGTGTGGAAGAACTACGTGTTCTACGTGAAGGCAAACCAATTGCAGGAAACATT GCAGCTCCGCAATACTGGCACTGCTGATGTTCTAGCTGATGGTATGGTGTTTGGAAAGGTT CAGTAC
KP32gp38_LEC (488-576)	KP32gp38_LEC (488-576) PS PE	-	ACCATG GATTATATTGACTGGGACTTCGCAATAGCCCCCGGTACACTAGCTGCTGGTGCCAAGTATACAACACCTAACCAGTCGTACCTAGATGTTGCTGGGATGCGCGTTCAGGCCGTTAGTATTCCAATGTTCGACGGACCAACAACAGGGTTGCAGGTCTGGGTTGAAGCAACCAGCGCCAACGGTTCGTTTGTTGTTGTCATGAAGAACGACACAGGGTCTGAGCTGGTGACCACAGTAACACGATGCCGAGTAAGGGCATTCGTATCA CAGTAC
KP34gp57_ KP32gp38_CBM	KP34gp57 PS PM	KP32gp38_CBM (380-487) PM PE	ACCATG GCACTCACTAAACTAGTAGATGCAGGCGCCTGGCAAGTAGAAGTAGCCCCAGCTGGCACAGTACAGG ATTCCCTAGTATTCTTATCCCCACGCAACTTCGGAGGAGTACCAGGCACGGGCGTAGATAGTGTAGCAGC TATAGAAGCCGCCCTAGCGGCAGGCGACGTAGACTTAGGTGGTGAGCACTGGTTTATTAGCAGGCCCATC TATTGCGTATCCGGCCGTACCATTCAGAACGGTAAGATTTCTACCTTAGCAGCCCAAGGCTCTGGGTTTA TGGCTGGCAGTATCTTCGCACCGGGGAACTATCACCCTGTATACGTAGACCCTGTGCCGAAGCTGGCATG CTCAAGTACAAACGGCTCAGCCACTATTACAGTAAGCTCT…
K11gp17_ KP32gp38_CBM	K11gp17 PS PM	KP32gp38_CBM (380-487) PM PE	ACCATG GACCAAGACATTAAAACAGTCATTCAGTACCCAGTAGGGGCCACTGAGTTCGACATCCCGTTCGACT ACCTGTCCCGTAAGTTTGTCCGTGTGTCGCTGGCAGCTGACGACAACCGCAGACTGCTGAGTAACATCAC TGAGTACCGCTACGTGTCTAAGACCAGAGTGAAGCTCCTTGTGGAAACTACCGGGTTCGACCGTGTGGAA ATCCGCAGATTCACCTCAGCGTCTGAGCGTATTGTTGACTTCAGCGACGGCTCCGTACTGCGGGCAACAG ACCTTAACGTTTCTCAGATTCAGTCTGCCCATATCGCAGAGGAAGCACGTGATTCAGCACTGTTGGCTAT GCCGCAGGATGATGCTGGCAACCTTGATGCCCGTAACCGC…
K11gp0043_ KP32gp38_CBM	K11gp0043 PS PM	KP32gp38_CBM (380-487) PM PE	ACCATG CTGAATGATTTAAACCAACCACGAGGCTCGACGCTGGGCCTCTTTACTCCAAACCTTCCGTTGAAGA AGCGGTTGGACACCTTACCAAACATTTTAGATTTTGATTCAGACAGCCTTAACGATGATAGCACTCGGTT TCAAAAGGCTATTACAGCTGGTGTGAAATCTTTATACGTCCCAGAACCTCAGTTCTTTGGCAACAATAAG CCTCTTAAAATTGCTAACGTTGACATTGTGACCAATATGCACATCTACGGGAACGGCTCAGCGGGATACC GTCAGGTTGGCGGGGCCATCACCATCCTAGATGGAGCGGACTATGGGTTTAAACTGGCTGGTGTCGACTC TCAGACGCGAAACATTGGAGGCCGCATTGACGGTCTCTCG…
KP36gp50_ KP32gp38_CBM	KP36gp50 PS PM	KP32gp38_CBM (380-487) PM PE	ACCATG GCACTATACAGAGAAGGCAAAGCGGCTATGGCCGCAGACGGAACCGTTACCGGGACTGGCACAAAAT GGCAATCTTCGCTTTCGCTGATTCGCCCAGGCGCGACGATTATGTTTTTGTCGTCACCAATTCAAATGGC CGTCGTAAACAAGGTGGTTAGCGATACTGAAATTAAAGCCATCACCACAAACGGCGCTGTCGTAGCGTCT AGCGATTACGCGATCCTGTTAAGTGACTCACTTACCGTTGACGGTCTGGCGCAAGATGTTGCTGAAACTC TGCGCTACTATCAGTCACAGGAAACCGTGATCGCGGATGCAGTCGAGTTCTTCAAGAACTTTGATTTCGA TTCCCTGCAAGATCTTGCTAACCAAATTAATGCAGACTCT…
KP32gp37_ KP32gp38_CBM	KP32gp37 PS PM	KP32gp38_CBM (380-487) PM PE	ACCATG GACCAAGATATTAAAACAATCATTCAGTACCCAACAGGAGCCACTGAGTTTGACATCCCGTTTGACT ACCTGTCCCGCAAGTTTGTCCGCGTGTCTCTGGTATCGGACGACAACCGCCGACTCTTGCGCAACATCAC GGAGTACCGTTACGTGTCGAAGACTCGCGTTAAGATTCTGGTGGACACCACTGGGTTCGACCGAGTTGAA ATCCGACGGTTCACCTCAGCGTCTGAACGTGTTGTGGACTTCAGTGATGGCTCTGTGCTCCGCGCTAACG ACCTAAACGTGTCCCAGCTACAGTCTTCACATATTGCCGAAGAGGCCCGTGACAGTGCGCTTCTGGCCAT GCCTGAGGATGATGCTGGTAACCTCGACGCGAGAAACCGT…
KP34gp57_ KP32gp38_CBM-LEC	KP34gp57 PS PM	KP32gp38_CBM-LEC (380-576) PM PE	ACCATG GCACTCACTAAACTAGTAGATGCAGGCGCCTGGCAAGTAGAAGTAGCCCCAGCTGGCACAGTACAGG ATTCCCTAGTATTCTTATCCCCACGCAACTTCGGAGGAGTACCAGGCACGGGCGTAGATAGTGTAGCAGC TATAGAAGCCGCCCTAGCGGCAGGCGACGTAGACTTAGGTGGTGAGCACTGGTTTATTAGCAGGCCCATC TATTGCGTATCCGGCCGTACCATTCAGAACGGTAAGATTTCTACCTTAGCAGCCCAAGGCTCTGGGTTTA TGGCTGGCAGTATCTTCGCACCGGGGAACTATCACCCTGTATACGTAGACCCTGTGCCGAAGCTGGCATG CTCAAGTACAAACGGCTCAGCCACTATTACAGTAAGCTCT…
K11gp17_ KP32gp38_CBM-LEC	K11gp17 PS PM	KP32gp38_CBM-LEC (380-576) PM PE	ACCATG GACCAAGACATTAAAACAGTCATTCAGTACCCAGTAGGGGCCACTGAGTTCGACATCCCGTTCGACT ACCTGTCCCGTAAGTTTGTCCGTGTGTCGCTGGCAGCTGACGACAACCGCAGACTGCTGAGTAACATCAC TGAGTACCGCTACGTGTCTAAGACCAGAGTGAAGCTCCTTGTGGAAACTACCGGGTTCGACCGTGTGGAA ATCCGCAGATTCACCTCAGCGTCTGAGCGTATTGTTGACTTCAGCGACGGCTCCGTACTGCGGGCAACAG ACCTTAACGTTTCTCAGATTCAGTCTGCCCATATCGCAGAGGAAGCACGTGATTCAGCACTGTTGGCTAT GCCGCAGGATGATGCTGGCAACCTTGATGCCCGTAACCGC…
K11gp0043_ KP32gp38_CBM-LEC	K11gp0043 PS PM	KP32gp38_CBM-LEC (380-576) PM PE	ACCATG CTGAATGATTTAAACCAACCACGAGGCTCGACGCTGGGCCTCTTTACTCCAAACCTTCCGTTGAAGA AGCGGTTGGACACCTTACCAAACATTTTAGATTTTGATTCAGACAGCCTTAACGATGATAGCACTCGGTT TCAAAAGGCTATTACAGCTGGTGTGAAATCTTTATACGTCCCAGAACCTCAGTTCTTTGGCAACAATAAG CCTCTTAAAATTGCTAACGTTGACATTGTGACCAATATGCACATCTACGGGAACGGCTCAGCGGGATACC GTCAGGTTGGCGGGGCCATCACCATCCTAGATGGAGCGGACTATGGGTTTAAACTGGCTGGTGTCGACTC TCAGACGCGAAACATTGGAGGCCGCATTGACGGTCTCTCG…
KP36gp50_ KP32gp38_CBM-LEC	KP36gp50 PS PM	KP32gp38_CBM-LEC (380-576) PM PE	ACCATG GCACTATACAGAGAAGGCAAAGCGGCTATGGCCGCAGACGGAACCGTTACCGGGACTGGCACAAAAT GGCAATCTTCGCTTTCGCTGATTCGCCCAGGCGCGACGATTATGTTTTTGTCGTCACCAATTCAAATGGC CGTCGTAAACAAGGTGGTTAGCGATACTGAAATTAAAGCCATCACCACAAACGGCGCTGTCGTAGCGTCT AGCGATTACGCGATCCTGTTAAGTGACTCACTTACCGTTGACGGTCTGGCGCAAGATGTTGCTGAAACTC TGCGCTACTATCAGTCACAGGAAACCGTGATCGCGGATGCAGTCGAGTTCTTCAAGAACTTTGATTTCGA TTCCCTGCAAGATCTTGCTAACCAAATTAATGCAGACTCT…
KP32gp37_ KP32gp38_CBM-LEC	KP32gp37 PS PM	KP32gp38_CBM-LEC (380-576) PM PE	ACCATG GACCAAGATATTAAAACAATCATTCAGTACCCAACAGGAGCCACTGAGTTTGACATCCCGTTTGACT ACCTGTCCCGCAAGTTTGTCCGCGTGTCTCTGGTATCGGACGACAACCGCCGACTCTTGCGCAACATCAC GGAGTACCGTTACGTGTCGAAGACTCGCGTTAAGATTCTGGTGGACACCACTGGGTTCGACCGAGTTGAA ATCCGACGGTTCACCTCAGCGTCTGAACGTGTTGTGGACTTCAGTGATGGCTCTGTGCTCCGCGCTAACG ACCTAAACGTGTCCCAGCTACAGTCTTCACATATTGCCGAAGAGGCCCGTGACAGTGCGCTTCTGGCCAT GCCTGAGGATGATGCTGGTAACCTCGACGCGAGAAACCGT…
KP34gp57_ KP32gp38_LIN-CBM	KP34gp57 PS PM	KP32gp38_LIN-CBM ( 361-487) PM PE	ACCATG GCACTCACTAAACTAGTAGATGCAGGCGCCTGGCAAGTAGAAGTAGCCCCAGCTGGCACAGTACAGG ATTCCCTAGTATTCTTATCCCCACGCAACTTCGGAGGAGTACCAGGCACGGGCGTAGATAGTGTAGCAGC TATAGAAGCCGCCCTAGCGGCAGGCGACGTAGACTTAGGTGGTGAGCACTGGTTTATTAGCAGGCCCATC TATTGCGTATCCGGCCGTACCATTCAGAACGGTAAGATTTCTACCTTAGCAGCCCAAGGCTCTGGGTTTA TGGCTGGCAGTATCTTCGCACCGGGGAACTATCACCCTGTATACGTAGACCCTGTGCCGAAGCTGGCATG CTCAAGTACAAACGGCTCAGCCACTATTACAGTAAGCTCT…
K11gp17_ KP32gp38_LIN-CBM	K11gp17 PS PM	KP32gp38_LIN-CBM ( 361-487) PM PE	ACCATG GACCAAGACATTAAAACAGTCATTCAGTACCCAGTAGGGGCCACTGAGTTCGACATCCCGTTCGACT ACCTGTCCCGTAAGTTTGTCCGTGTGTCGCTGGCAGCTGACGACAACCGCAGACTGCTGAGTAACATCAC TGAGTACCGCTACGTGTCTAAGACCAGAGTGAAGCTCCTTGTGGAAACTACCGGGTTCGACCGTGTGGAA ATCCGCAGATTCACCTCAGCGTCTGAGCGTATTGTTGACTTCAGCGACGGCTCCGTACTGCGGGCAACAG ACCTTAACGTTTCTCAGATTCAGTCTGCCCATATCGCAGAGGAAGCACGTGATTCAGCACTGTTGGCTAT GCCGCAGGATGATGCTGGCAACCTTGATGCCCGTAACCGC…
K11gp0043_ KP32gp38_LIN-CBM	K11gp0043 PS PM	KP32gp38_LIN-CBM ( 361-487) PM PE	ACCATG CTGAATGATTTAAACCAACCACGAGGCTCGACGCTGGGCCTCTTTACTCCAAACCTTCCGTTGAAGA AGCGGTTGGACACCTTACCAAACATTTTAGATTTTGATTCAGACAGCCTTAACGATGATAGCACTCGGTT TCAAAAGGCTATTACAGCTGGTGTGAAATCTTTATACGTCCCAGAACCTCAGTTCTTTGGCAACAATAAG CCTCTTAAAATTGCTAACGTTGACATTGTGACCAATATGCACATCTACGGGAACGGCTCAGCGGGATACC GTCAGGTTGGCGGGGCCATCACCATCCTAGATGGAGCGGACTATGGGTTTAAACTGGCTGGTGTCGACTC TCAGACGCGAAACATTGGAGGCCGCATTGACGGTCTCTCG…
KP36gp50_ KP32gp38_LIN-CBM	KP36gp50 PS PM	KP32gp38_LIN-CBM ( 361-487) PM PE	ACCATG GCACTATACAGAGAAGGCAAAGCGGCTATGGCCGCAGACGGAACCGTTACCGGGACTGGCACAAAAT GGCAATCTTCGCTTTCGCTGATTCGCCCAGGCGCGACGATTATGTTTTTGTCGTCACCAATTCAAATGGC CGTCGTAAACAAGGTGGTTAGCGATACTGAAATTAAAGCCATCACCACAAACGGCGCTGTCGTAGCGTCT AGCGATTACGCGATCCTGTTAAGTGACTCACTTACCGTTGACGGTCTGGCGCAAGATGTTGCTGAAACTC TGCGCTACTATCAGTCACAGGAAACCGTGATCGCGGATGCAGTCGAGTTCTTCAAGAACTTTGATTTCGA TTCCCTGCAAGATCTTGCTAACCAAATTAATGCAGACTCT…
KP32gp37_ KP32gp38_LIN-CBM	KP32gp37 PS PM	KP32gp38_LIN-CBM ( 361-487) PM PE	ACCATG GACCAAGATATTAAAACAATCATTCAGTACCCAACAGGAGCCACTGAGTTTGACATCCCGTTTGACT ACCTGTCCCGCAAGTTTGTCCGCGTGTCTCTGGTATCGGACGACAACCGCCGACTCTTGCGCAACATCAC GGAGTACCGTTACGTGTCGAAGACTCGCGTTAAGATTCTGGTGGACACCACTGGGTTCGACCGAGTTGAA ATCCGACGGTTCACCTCAGCGTCTGAACGTGTTGTGGACTTCAGTGATGGCTCTGTGCTCCGCGCTAACG ACCTAAACGTGTCCCAGCTACAGTCTTCACATATTGCCGAAGAGGCCCGTGACAGTGCGCTTCTGGCCAT GCCTGAGGATGATGCTGGTAACCTCGACGCGAGAAACCGT…
KP34gp57_ KP32gp38_LIN-CBM-LEC	KP34gp57 PS PM	KP32gp38_LIN-CBM-LEC (361-576) PM PE	ACCATG GCACTCACTAAACTAGTAGATGCAGGCGCCTGGCAAGTAGAAGTAGCCCCAGCTGGCACAGTACAGG ATTCCCTAGTATTCTTATCCCCACGCAACTTCGGAGGAGTACCAGGCACGGGCGTAGATAGTGTAGCAGC TATAGAAGCCGCCCTAGCGGCAGGCGACGTAGACTTAGGTGGTGAGCACTGGTTTATTAGCAGGCCCATC TATTGCGTATCCGGCCGTACCATTCAGAACGGTAAGATTTCTACCTTAGCAGCCCAAGGCTCTGGGTTTA TGGCTGGCAGTATCTTCGCACCGGGGAACTATCACCCTGTATACGTAGACCCTGTGCCGAAGCTGGCATG CTCAAGTACAAACGGCTCAGCCACTATTACAGTAAGCTCT…
K11gp17_ KP32gp38_LIN-CBM-LEC	K11gp17 PS PM	KP32gp38_LIN-CBM-LEC (361-576) PM PE	ACCATG GACCAAGACATTAAAACAGTCATTCAGTACCCAGTAGGGGCCACTGAGTTCGACATCCCGTTCGACT ACCTGTCCCGTAAGTTTGTCCGTGTGTCGCTGGCAGCTGACGACAACCGCAGACTGCTGAGTAACATCAC TGAGTACCGCTACGTGTCTAAGACCAGAGTGAAGCTCCTTGTGGAAACTACCGGGTTCGACCGTGTGGAA ATCCGCAGATTCACCTCAGCGTCTGAGCGTATTGTTGACTTCAGCGACGGCTCCGTACTGCGGGCAACAG ACCTTAACGTTTCTCAGATTCAGTCTGCCCATATCGCAGAGGAAGCACGTGATTCAGCACTGTTGGCTAT GCCGCAGGATGATGCTGGCAACCTTGATGCCCGTAACCGC…
K11gp0043_ KP32gp38_LIN-CBM-LEC	K11gp0043 PS PM	KP32gp38_LIN-CBM-LEC (361-576) PM PE	ACCATG CTGAATGATTTAAACCAACCACGAGGCTCGACGCTGGGCCTCTTTACTCCAAACCTTCCGTTGAAGA AGCGGTTGGACACCTTACCAAACATTTTAGATTTTGATTCAGACAGCCTTAACGATGATAGCACTCGGTT TCAAAAGGCTATTACAGCTGGTGTGAAATCTTTATACGTCCCAGAACCTCAGTTCTTTGGCAACAATAAG CCTCTTAAAATTGCTAACGTTGACATTGTGACCAATATGCACATCTACGGGAACGGCTCAGCGGGATACC GTCAGGTTGGCGGGGCCATCACCATCCTAGATGGAGCGGACTATGGGTTTAAACTGGCTGGTGTCGACTC TCAGACGCGAAACATTGGAGGCCGCATTGACGGTCTCTCG…
KP36gp50_ KP32gp38_LIN-CBM-LEC	KP36gp50 PS PM	KP32gp38_LIN-CBM-LEC (361-576) PM PE	ACCATG GCACTATACAGAGAAGGCAAAGCGGCTATGGCCGCAGACGGAACCGTTACCGGGACTGGCACAAAAT GGCAATCTTCGCTTTCGCTGATTCGCCCAGGCGCGACGATTATGTTTTTGTCGTCACCAATTCAAATGGC CGTCGTAAACAAGGTGGTTAGCGATACTGAAATTAAAGCCATCACCACAAACGGCGCTGTCGTAGCGTCT AGCGATTACGCGATCCTGTTAAGTGACTCACTTACCGTTGACGGTCTGGCGCAAGATGTTGCTGAAACTC TGCGCTACTATCAGTCACAGGAAACCGTGATCGCGGATGCAGTCGAGTTCTTCAAGAACTTTGATTTCGA TTCCCTGCAAGATCTTGCTAACCAAATTAATGCAGACTCT…
KP32gp37_ KP32gp38_LIN-CBM-LEC	KP32gp37 PS PM	KP32gp38_LIN-CBM-LEC (361-576) PM PE	ACCATG GACCAAGATATTAAAACAATCATTCAGTACCCAACAGGAGCCACTGAGTTTGACATCCCGTTTGACT ACCTGTCCCGCAAGTTTGTCCGCGTGTCTCTGGTATCGGACGACAACCGCCGACTCTTGCGCAACATCAC GGAGTACCGTTACGTGTCGAAGACTCGCGTTAAGATTCTGGTGGACACCACTGGGTTCGACCGAGTTGAA ATCCGACGGTTCACCTCAGCGTCTGAACGTGTTGTGGACTTCAGTGATGGCTCTGTGCTCCGCGCTAACG ACCTAAACGTGTCCCAGCTACAGTCTTCACATATTGCCGAAGAGGCCCGTGACAGTGCGCTTCTGGCCAT GCCTGAGGATGATGCTGGTAACCTCGACGCGAGAAACCGT…
KP34gp57_ KP32gp38_LEC	KP34gp57 PS PM	Kp32gp38_LEC (488-576) PM PE	ACCATG GCACTCACTAAACTAGTAGATGCAGGCGCCTGGCAAGTAGAAGTAGCCCCAGCTGGCACAGTACAGG ATTCCCTAGTATTCTTATCCCCACGCAACTTCGGAGGAGTACCAGGCACGGGCGTAGATAGTGTAGCAGC TATAGAAGCCGCCCTAGCGGCAGGCGACGTAGACTTAGGTGGTGAGCACTGGTTTATTAGCAGGCCCATC TATTGCGTATCCGGCCGTACCATTCAGAACGGTAAGATTTCTACCTTAGCAGCCCAAGGCTCTGGGTTTA TGGCTGGCAGTATCTTCGCACCGGGGAACTATCACCCTGTATACGTAGACCCTGTGCCGAAGCTGGCATG CTCAAGTACAAACGGCTCAGCCACTATTACAGTAAGCTCT…
K11gp17_ KP32gp38_LEC	K11gp17 PS PM	Kp32gp38_LEC (488-576) PM PE	ACCATG GACCAAGACATTAAAACAGTCATTCAGTACCCAGTAGGGGCCACTGAGTTCGACATCCCGTTCGACT ACCTGTCCCGTAAGTTTGTCCGTGTGTCGCTGGCAGCTGACGACAACCGCAGACTGCTGAGTAACATCAC TGAGTACCGCTACGTGTCTAAGACCAGAGTGAAGCTCCTTGTGGAAACTACCGGGTTCGACCGTGTGGAA ATCCGCAGATTCACCTCAGCGTCTGAGCGTATTGTTGACTTCAGCGACGGCTCCGTACTGCGGGCAACAG ACCTTAACGTTTCTCAGATTCAGTCTGCCCATATCGCAGAGGAAGCACGTGATTCAGCACTGTTGGCTAT GCCGCAGGATGATGCTGGCAACCTTGATGCCCGTAACCGC…
K11gp0043_ KP32gp38_LEC	K11gp0043 PS PM	Kp32gp38_LEC (488-576) PM PE	ACCATG CTGAATGATTTAAACCAACCACGAGGCTCGACGCTGGGCCTCTTTACTCCAAACCTTCCGTTGAAGA AGCGGTTGGACACCTTACCAAACATTTTAGATTTTGATTCAGACAGCCTTAACGATGATAGCACTCGGTT TCAAAAGGCTATTACAGCTGGTGTGAAATCTTTATACGTCCCAGAACCTCAGTTCTTTGGCAACAATAAG CCTCTTAAAATTGCTAACGTTGACATTGTGACCAATATGCACATCTACGGGAACGGCTCAGCGGGATACC GTCAGGTTGGCGGGGCCATCACCATCCTAGATGGAGCGGACTATGGGTTTAAACTGGCTGGTGTCGACTC TCAGACGCGAAACATTGGAGGCCGCATTGACGGTCTCTCG…
KP36gp50_ KP32gp38_LEC	KP36gp50 PS PM	Kp32gp38_LEC (488-576) PM PE	ACCATG GCACTATACAGAGAAGGCAAAGCGGCTATGGCCGCAGACGGAACCGTTACCGGGACTGGCACAAAAT GGCAATCTTCGCTTTCGCTGATTCGCCCAGGCGCGACGATTATGTTTTTGTCGTCACCAATTCAAATGGC CGTCGTAAACAAGGTGGTTAGCGATACTGAAATTAAAGCCATCACCACAAACGGCGCTGTCGTAGCGTCT AGCGATTACGCGATCCTGTTAAGTGACTCACTTACCGTTGACGGTCTGGCGCAAGATGTTGCTGAAACTC TGCGCTACTATCAGTCACAGGAAACCGTGATCGCGGATGCAGTCGAGTTCTTCAAGAACTTTGATTTCGA TTCCCTGCAAGATCTTGCTAACCAAATTAATGCAGACTCT…
KP32gp37_ KP32gp38_LEC	KP32gp37 PS PM	Kp32gp38_LEC (488-576) PM PE	ACCATG GACCAAGATATTAAAACAATCATTCAGTACCCAACAGGAGCCACTGAGTTTGACATCCCGTTTGACT ACCTGTCCCGCAAGTTTGTCCGCGTGTCTCTGGTATCGGACGACAACCGCCGACTCTTGCGCAACATCAC GGAGTACCGTTACGTGTCGAAGACTCGCGTTAAGATTCTGGTGGACACCACTGGGTTCGACCGAGTTGAA ATCCGACGGTTCACCTCAGCGTCTGAACGTGTTGTGGACTTCAGTGATGGCTCTGTGCTCCGCGCTAACG ACCTAAACGTGTCCCAGCTACAGTCTTCACATATTGCCGAAGAGGCCCGTGACAGTGCGCTTCTGGCCAT GCCTGAGGATGATGCTGGTAACCTCGACGCGAGAAACCGT…
KP32gp38_CP-E_K11gp0043_LIN-CBM-LEC	KP32gp38 CP Enz PS-PM (1-360)	K11gp0043 Lin CBM LEC PM PE (368-596)	ACCATG TTAGACAATTTCAATCAGCCGAAAGGCTCAACCATTGGTGTGCTCAAGGATGGGCGCACTATCCAAGAGGCATTCGACTCATTACCGCGCCTTGAGTCC TTCTCTGGGTCCACGGCAACCGACAAGCTACGCGCAGCCATCACCTTAGGTGTATCTGAGGTCGCCATCGGTCCTGTTGAAGGTAACGGCGGAAGGCCTTATGAGTTCGGGGATGTAGTCATTCCGTATCCTCTGCGTATTGTAGGTTGTGGTTCTCAAGGTATCAACGTTACCAAGGGAACAGTCCTCAAGCGTTCTGCGGGTGCATCCTTCATGTTCCACTTCACGGGCGAGGGACAAGCTCAGCGTCCTATGGGCGGTGGGTTGTTTAACATCAACCTGAATGGGGACA…
KP32gp38_CP-E-LIN_K11gp0043_CBM-LEC	KP32gp38 CP Enz Lin PS-PM (1-379)	K11gp0043 CBM LEC PM PE (389-596)	ACCATG TTAGACAATTTCAATCAGCCGAAAGGCTCAACCATTGGTGTGCTCAAGGATGGGCGCACTATCCAAGAGGCATTCGACTCATTACCGCGCCTTGAGTCCTTCTCTGGGTCCACGGCAACCGACAAGCTACGCGCAGCCATCACCTTAGGTGTATCTGAGGTCGCCATCGGTCCTGTTGAAGGTAACGGCGGAAGGCCTTATGAGTTCGGGGATGTAGTCATTCCGTATCCTCTGCGTATTGTAGGTTGTGGTTCTCAAGGTATCAACGTTACCAAGGGAACAGTCCTCAAGCGTTCTGCGGGTGCATCCTTCATGTTCCACTTCACGGGCGAGGGACAAGCTCAGCGTCCTATGGGCGGTGGGTTGTTTAACATCAACCTGAATGGGGACAC…
KP32gp38_CP-E-LIN-CBM_K11gp0043_LEC	KP32gp38 CP Enz Lin CBM (1-487)	K11gp0043 LEC PM PE (512-596)	ACCATG TTAGACAATTTCAATCAGCCGAAAGGCTCAACCATTGGTGTGCTCAAGGATGGGCGCACTATCCAAGAGGCATTCGACTCATTACCGCGCCTTGAGTCCTTCTCTGGGTCCACGGCAACCGACAAGCTACGCGCAGCCATCACCTTAGGTGTATCTGAGGTCGCCATCGGTCCTGTTGAAGGTAACGGCGGAAGGCCTTATGAGTTCGGGGATGTAGTCATTCCGTATCCTCTGCGTATTGTAGGTTGTGGTTCTCAAGGTATCAACGTTACCAAGGGAACAGTCCTCAAGCGTTCTGCGGGTGCATCCTTCATGTTCCACTTCACGGGCGAGGGACAAGCTCAGCGTCCTATGGGCGGTGGGTTGTTTAACATCAACCTGAATGGGGACAC…
K11gp0043_CP-E_KP32gp38_LIN-CBM-LEC	K11gp0043 CP Enz (1-367)	KP32gp38 Lin CBM LEC PM PE (361-576)	ACCATG CTGAATGATTTAAACCAACCACGAGGCTCGACGCTGGGCCTCTTTACTCCAAACCTTCCGTTGAAGAAGCGGTTGGACACCTTACCAAACATTTTAGATTTTGATTCAGACAGCCTTAACGATGATAGCACTCGGTTTCAAAAGGCTATTACAGCTGGTGTGAAATCTTTATACGTCCCAGAACCTCAGTTCTTTGGCAACAATAAGCCTCTTAAAATTGCTAACGTTGACATTGTGACCAATATGCACATCTACGGGAACGGCTCAGCGGGATACCGTCAGGTTGGCGGGGCCATCACCATCCTAGATGGAGCGGACTATGGGTTTAAACTGGCTGGTGTCGACTCTCAGACGCGAAACATTGGAGGCCGCATTGACGGTCTCTCGTTCCA…
K11gp0043_CP-E-LIN_KP32gp38_CBM-LEC	K11gp0043 CP Enz Lin (1-388)	KP32gp38 CBM LEC PM PE (380-576)	ACCATG CTGAATGATTTAAACCAACCACGAGGCTCGACGCTGGGCCTCTTTACTCCAAACCTTCCGTTGAAGAAGCGGTTGGACACCTTACCAAACATTTTAGATTTTGATTCAGACAGCCTTAACGATGATAGCACTCGGTTTCAAAAGGCTATTACAGCTGGTGTGAAATCTTTATACGTCCCAGAACCTCAGTTCTTTGGCAACAATAAGCCTCTTAAAATTGCTAACGTTGACATTGTGACCAATATGCACATCTACGGGAACGGCTCAGCGGGATACCGTCAGGTTGGCGGGGCCATCACCATCCTAGATGGAGCGGACTATGGGTTTAAACTGGCTGGTGTCGACTCTCAGACGCGAAACATTGGAGGCCGCATTGACGGTCTCTCGTTCCA…
K11gp0043_CP-E-LIN-CBM_KP32gp38_LEC	K11gp0043 CP Enz Lin CBM (1-511)	Kp32gp38 LEC PM PE (488-576)	ACCATG CTGAATGATTTAAACCAACCACGAGGCTCGACGCTGGGCCTCTTTACTCCAAACCTTCCGTTGAAGAAGCGGTTGGACACCTTACCAAACATTTTAGATTTTGATTCAGACAGCCTTAACGATGATAGCACTCGGTTTCAAAAGGCTATTACAGCTGGTGTGAAATCTTTATACGTCCCAGAACCTCAGTTCTTTGGCAACAATAAGCCTCTTAAAATTGCTAACGTTGACATTGTGACCAATATGCACATCTACGGGAACGGCTCAGCGGGATACCGTCAGGTTGGCGGGGCCATCACCATCCTAGATGGAGCGGACTATGGGTTTAAACTGGCTGGTGTCGACTCTCAGACGCGAAACATTGGAGGCCGCATTGACGGTCTCTCGTTCCA…
KP32gp38_CP-E_PM_LIN-CBM-LEC	KP32gp38 CP Enz PS-PM (1-360)	KP32gp38 Lin CBM LEC PM PE (361-576)	ACCATG TTAGACAATTTCAATCAGCCGAAAGGCTCAACCATTGGTGTGCTCAAGGATGGGCGCACTATCCAAGAGGCATTCGACTCATTACCGCGCCTTGAGTCC TTCTCTGGGTCCACGGCAACCGACAAGCTACGCGCAGCCATCACCTTAGGTGTATCTGAGGTCGCCATCGGTCCTGTTGAAGGTAACGGCGGAAGGCCTTATGAGTTCGGGGATGTAGTCATTCCGTATCCTCTGCGTATTGTAGGTTGTGGTTCTCAAGGTATCAACGTTACCAAGGGAACAGTCCTCAAGCGTTCTGCGGGTGCATCCTTCATGTTCCACTTCACGGGCGAGGGACAAGCTCAGCGTCCTATGGGCGGTGGGTTGTTTAACATCAACCTGAATGGGGACA…
KP32gp38_CP-E-LIN_PM_CBM-LEC	KP32gp38 CP Enz Lin PS-PM (1-379)	KP32gp38 CBM LEC PM PE (380-576)	ACCATG TTAGACAATTTCAATCAGCCGAAAGGCTCAACCATTGGTGTGCTCAAGGATGGGCGCACTATCCAAGAGGCATTCGACTCATTACCGCGCCTTGAGTCCTTCTCTGGGTCCACGGCAACCGACAAGCTACGCGCAGCCATCACCTTAGGTGTATCTGAGGTCGCCATCGGTCCTGTTGAAGGTAACGGCGGAAGGCCTTATGAGTTCGGGGATGTAGTCATTCCGTATCCTCTGCGTATTGTAGGTTGTGGTTCTCAAGGTATCAACGTTACCAAGGGAACAGTCCTCAAGCGTTCTGCGGGTGCATCCTTCATGTTCCACTTCACGGGCGAGGGACAAGCTCAGCGTCCTATGGGCGGTGGGTTGTTTAACATCAACCTGAATGGGGACAC…
KP32gp38_CP-E-LIN-CBM_PM_LEC	KP32gp38 CP Enz Lin CBM (1-487)	Kp32gp38 LEC PM PE (488-576)	ACCATG TTAGACAATTTCAATCAGCCGAAAGGCTCAACCATTGGTGTGCTCAAGGATGGGCGCACTATCCAAGAGGCATTCGACTCATTACCGCGCCTTGAGTCCTTCTCTGGGTCCACGGCAACCGACAAGCTACGCGCAGCCATCACCTTAGGTGTATCTGAGGTCGCCATCGGTCCTGTTGAAGGTAACGGCGGAAGGCCTTATGAGTTCGGGGATGTAGTCATTCCGTATCCTCTGCGTATTGTAGGTTGTGGTTCTCAAGGTATCAACGTTACCAAGGGAACAGTCCTCAAGCGTTCTGCGGGTGCATCCTTCATGTTCCACTTCACGGGCGAGGGACAAGCTCAGCGTCCTATGGGCGGTGGGTTGTTTAACATCAACCTGAATGGGGACAC…
K11gp0043_CP-E_PM_LIN-CBM-LEC	K11gp0043 CP Enz (1-367)	K11gp0043 Lin CBM LEC PM PE (368-595)	ACCATG CTGAATGATTTAAACCAACCACGAGGCTCGACGCTGGGCCTCTTTACTCCAAACCTTCCGTTGAAGAAGCGGTTGGACACCTTACCAAACATTTTAGATTTTGATTCAGACAGCCTTAACGATGATAGCACTCGGTTTCAAAAGGCTATTACAGCTGGTGTGAAATCTTTATACGTCCCAGAACCTCAGTTCTTTGGCAACAATAAGCCTCTTAAAATTGCTAACGTTGACATTGTGACCAATATGCACATCTACGGGAACGGCTCAGCGGGATACCGTCAGGTTGGCGGGGCCATCACCATCCTAGATGGAGCGGACTATGGGTTTAAACTGGCTGGTGTCGACTCTCAGACGCGAAACATTGGAGGCCGCATTGACGGTCTCTCGTTCCA…
K11gp0043_CP-E-LIN_PM_CBM-LEC	K11gp0043 CP Enz Lin (1-388)	K11gp0043 CBM LEC PM PE (389-595)	ACCATG CTGAATGATTTAAACCAACCACGAGGCTCGACGCTGGGCCTCTTTACTCCAAACCTTCCGTTGAAGAAGCGGTTGGACACCTTACCAAACATTTTAGATTTTGATTCAGACAGCCTTAACGATGATAGCACTCGGTTTCAAAAGGCTATTACAGCTGGTGTGAAATCTTTATACGTCCCAGAACCTCAGTTCTTTGGCAACAATAAGCCTCTTAAAATTGCTAACGTTGACATTGTGACCAATATGCACATCTACGGGAACGGCTCAGCGGGATACCGTCAGGTTGGCGGGGCCATCACCATCCTAGATGGAGCGGACTATGGGTTTAAACTGGCTGGTGTCGACTCTCAGACGCGAAACATTGGAGGCCGCATTGACGGTCTCTCGTTCCA…
K11gp0043_CP-E-LIN-CBM_PM_LEC	K11gp0043 CP Enz Lin CBM (1-511)	K11gp0043 LEC PM PE (512-595)	ACCATG CTGAATGATTTAAACCAACCACGAGGCTCGACGCTGGGCCTCTTTACTCCAAACCTTCCGTTGAAGAAGCGGTTGGACACCTTACCAAACATTTTAGATTTTGATTCAGACAGCCTTAACGATGATAGCACTCGGTTTCAAAAGGCTATTACAGCTGGTGTGAAATCTTTATACGTCCCAGAACCTCAGTTCTTTGGCAACAATAAGCCTCTTAAAATTGCTAACGTTGACATTGTGACCAATATGCACATCTACGGGAACGGCTCAGCGGGATACCGTCAGGTTGGCGGGGCCATCACCATCCTAGATGGAGCGGACTATGGGTTTAAACTGGCTGGTGTCGACTCTCAGACGCGAAACATTGGAGGCCGCATTGACGGTCTCTCGTTCCA…
K11gp0043_WT	K11gp0043_WT	-	ACCATG CTGAATGATTTAAACCAACCACGAGGCTCGACGCTGGGCCTCTTTACTCCAAACCTTCCGTTGAAGAAGCGGTTGGACACCTTACCAAACATTTTAGATTTTGATTCAGACAGCCTTAACGATGATAGCACTCGGTTTCAAAAGGCTATTACAGCTGGTGTGAAATCTTTATACGTCCCAGAACCTCAGTTCTTTGGCAACAATAAGCCTCTTAAAATTGCTAACGTTGACATTGTGACCAATATGCACATCTACGGGAACGGCTCAGCGGGATACCGTCAGGTTGGCGGGGCCATCACCATCCTAGATGGAGCGGACTATGGGTTTAAACTGGCTGGTGTCGACTCTCAGACGCGAAACATTGGAGGCCGCATTGACGGTCTCTCGTTCCA…
GFP	GFP PS PE	-	ACCATG AGCAAGGGCGAGGAG CTGTTCACCGGGGTGGTGCCCATCCTGGTCGAGCTGGACGGCGACGTAAACGGCCACAAGTTCAGCGTGTCCGGCGAGGGCGAGGGCGATGCCACCTACGGCAAGCTGACCCTGAAGTTCATCTGCACCACCGGCAAGCTGCCCGTGCCCTGGCCCACCCTCGTGACCACCCTGACCTACGGCGTGCAGTGCTTCAGCCGCTACCCCGACCACATGAAGCAGCACGACTTCTTCAAGTCCGCCATGCCCGAAGGCTACGTCCAGGAGCGCACCATCTTCTTCAAGGACGACGGCAACTACAAGACCCGCGCCGAGGTGAAGTTCGAGGGCGACACCCTGGTGAACCGCATCGAGCTGAAGGGCATCGACTTCAAGG…
GFP_KP32gp38_WT	GFP PS PM	KP32gp38_WT PM PE	ACCATG AGCAAGGGCGAGGAGCTGTTCACCGGGGTGGTGCCCATCCTGGTCGAGCTGGACGGCGACGTAAACGGCCACAAGTTCAGCGTGTCCGGCGAGGGCGAGGGCGATGCCACCTACGGCAAGCTGACCCTGAAGTTCATCTGCACCACCGGCAAGCTGCCCGTGCCCTGGCCCACCCTCGTGACCACCCTGACCTACGGCGTGCAGTGCTTCAGCCGCTACCCCGACCACATGAAGCAGCACGACTTCTTCAAGTCCGCCATGCCCGAAGGCTACGTCCAGGAGCGCACCATCTTCTTCAAGGACGACGGCAACTACAAGACCCGCGCCGAGGTGAAGTTCGAGGGCGACACCCTGGTGAACCGCATCGAGCTGAAGGGCATCGACTTCAAGGA…
GFP_KP32gp38_mut	GFP PS PM	KP32gp38_mut PM PE	ACCATG AGCAAGGGCGAGGAGCTGTTCACCGGGGTGGTGCCCATCCTGGTCGAGCTGGACGGCGACGTAAACGGCCACAAGTTCAGCGTGTCCGGCGAGGGCGAGGGCGATGCCACCTACGGCAAGCTGACCCTGAAGTTCATCTGCACCACCGGCAAGCTGCCCGTGCCCTGGCCCACCCTCGTGACCACCCTGACCTACGGCGTGCAGTGCTTCAGCCGCTACCCCGACCACATGAAGCAGCACGACTTCTTCAAGTCCGCCATGCCCGAAGGCTACGTCCAGGAGCGCACCATCTTCTTCAAGGACGACGGCAACTACAAGACCCGCGCCGAGGTGAAGTTCGAGGGCGACACCCTGGTGAACCGCATCGAGCTGAAGGGCATCGACTTCAAGGA…
GFP_KP32gp38_CP-E_mut	GFP PS PM	KP32gp38_CP-E_mut (1-360) PM PE	ACCATG AGCAAGGGCGAGGAGCTGTTCACCGGGGTGGTGCCCATCCTGGTCGAGCTGGACGGCGACGTAAACGGCCACAAGTTCAGCGTGTCCGGCGAGGGCGAGGGCGATGCCACCTACGGCAAGCTGACCCTGAAGTTCATCTGCACCACCGGCAAGCTGCCCGTGCCCTGGCCCACCCTCGTGACCACCCTGACCTACGGCGTGCAGTGCTTCAGCCGCTACCCCGACCACATGAAGCAGCACGACTTCTTCAAGTCCGCCATGCCCGAAGGCTACGTCCAGGAGCGCACCATCTTCTTCAAGGACGACGGCAACTACAAGACCCGCGCCGAGGTGAAGTTCGAGGGCGACACCCTGGTGAACCGCATCGAGCTGAAGGGCATCGACTTCAAGGA…
GFP_KP32gp38_LEC	GFP PS PM	KP32gp38_LEC (488-576) PM PE	ACCATG AGCAAGGGCGAGGAGCTGTTCACCGGGGTGGTGCCCATCCTGGTCGAGCTGGACGGCGACGTAAACGGCCACAAGTTCAGCGTGTCCGGCGAGGGCGAGGGCGATGCCACCTACGGCAAGCTGACCCTGAAGTTCATCTGCACCACCGGCAAGCTGCCCGTGCCCTGGCCCACCCTCGTGACCACCCTGACCTACGGCGTGCAGTGCTTCAGCCGCTACCCCGACCACATGAAGCAGCACGACTTCTTCAAGTCCGCCATGCCCGAAGGCTACGTCCAGGAGCGCACCATCTTCTTCAAGGACGACGGCAACTACAAGACCCGCGCCGAGGTGAAGTTCGAGGGCGACACCCTGGTGAACCGCATCGAGCTGAAGGGCATCGACTTCAAGGA…
GFP_KP32gp38_LIN-CBM_LEC	GFP PS PM	KP32gp38_CBM-LEC (361-576) PM PE	ACCATG AGCAAGGGCGAGGAGCTGTTCACCGGGGTGGTGCCCATCCTGGTCGAGCTGGACGGCGACGTAAACGGCCACAAGTTCAGCGTGTCCGGCGAGGGCGAGGGCGATGCCACCTACGGCAAGCTGACCCTGAAGTTCATCTGCACCACCGGCAAGCTGCCCGTGCCCTGGCCCACCCTCGTGACCACCCTGACCTACGGCGTGCAGTGCTTCAGCCGCTACCCCGACCACATGAAGCAGCACGACTTCTTCAAGTCCGCCATGCCCGAAGGCTACGTCCAGGAGCGCACCATCTTCTTCAAGGACGACGGCAACTACAAGACCCGCGCCGAGGTGAAGTTCGAGGGCGACACCCTGGTGAACCGCATCGAGCTGAAGGGCATCGACTTCAAGGA…
GFP_KP32gp38_LIN-CBM	GFP PS PM	KP32gp38_LIN-CBM (361-487) PM PE	ACCATG AGCAAGGGCGAGGAGCTGTTCACCGGGGTGGTGCCCATCCTGGTCGAGCTGGACGGCGACGTAAACGGCCACAAGTTCAGCGTGTCCGGCGAGGGCGAGGGCGATGCCACCTACGGCAAGCTGACCCTGAAGTTCATCTGCACCACCGGCAAGCTGCCCGTGCCCTGGCCCACCCTCGTGACCACCCTGACCTACGGCGTGCAGTGCTTCAGCCGCTACCCCGACCACATGAAGCAGCACGACTTCTTCAAGTCCGCCATGCCCGAAGGCTACGTCCAGGAGCGCACCATCTTCTTCAAGGACGACGGCAACTACAAGACCCGCGCCGAGGTGAAGTTCGAGGGCGACACCCTGGTGAACCGCATCGAGCTGAAGGGCATCGACTTCAAGGA…
GFP_KP32gp38_CBM-LEC	GFP PS PM	KP32gp38_CBM-LEC (380-576) PM PE	ACCATG AGCAAGGGCGAGGAGCTGTTCACCGGGGTGGTGCCCATCCTGGTCGAGCTGGACGGCGACGTAAACGGCCACAAGTTCAGCGTGTCCGGCGAGGGCGAGGGCGATGCCACCTACGGCAAGCTGACCCTGAAGTTCATCTGCACCACCGGCAAGCTGCCCGTGCCCTGGCCCACCCTCGTGACCACCCTGACCTACGGCGTGCAGTGCTTCAGCCGCTACCCCGACCACATGAAGCAGCACGACTTCTTCAAGTCCGCCATGCCCGAAGGCTACGTCCAGGAGCGCACCATCTTCTTCAAGGACGACGGCAACTACAAGACCCGCGCCGAGGTGAAGTTCGAGGGCGACACCCTGGTGAACCGCATCGAGCTGAAGGGCATCGACTTCAAGGA…

## Sheet: T S11
Table S11. Composition of tiles to assamble RBPs gene cluster of enginnered phages (ePs).
eP name	Tile name	Tile explanation	Tile seqence
KP32_gp38ΔLEC	Start_P1P2_KP32	KP32 bp 33238-33422 (before gp37)	AGAGGTCTCTGACTGGCCTGATGAACTCCACAAAGGAGCTTGTGCCAAACGACCCGCTTACCCAACAGCTAATCATGAAAATCTATGAAGCTAATGGTGTCACCATAAAGCAGCAGCCTAGACCCAACTAATTAGGGCACACTATAGGGAGGCCGACTGGTTTCCCTCCTATTCAACTTAAGGAGGTCACCATGGAGACCAAG
	RBP_P2P5_2	KP32gp37AE_2/869	AGAGGTCTCACCATGGACCAAGATATTAAAACAATCATTCAGTACCCAACAGGAGCCACTGAGTTTGACATCCCGTTTGACTACCTGTCCCGCAAGTTTGTCCGCGTGTCTCTGGTATCGGACGACAACCGCCGACTCTTGCGCAACATCACGGAGTACCGTTACGTGTCGAAGACTCGCGTTAAGATTCTGGTGGACACCACTGGGTTCGACCGAGTTGAAATCCGACGGTTCACCTCAGCGTCTGAACGTGTTGTGGACTTCAGTGATGGCTCTGTGCTCCGCGCTAACGACCTAAACGTGTCCCAGCTACAGTCTTCACATATTGCCGAAGAGGCCCGTGACAGTGCGCTTCTGGCCATGCCTGAGGATGATGCTGGTAACCTCGACGCGAGAAAC…
	RBP_P5P7_3	KP32gp38CPEnzLinCBM_1/487	CTTGGTCTCGGAGAACCTCATGTTAGACAATTTCAATCAGCCGAAAGGCTCAACCATTGGTGTGCTCAAGGATGGGCGCACTATCCAAGAGGCATTCGACTCATTACCGCGCCTTGAGTCCTTCTCTGGGTCCACGGCAACCGACAAGCTACGCGCAGCCATCACCTTAGGTGTATCTGAGGTCGCCATCGGTCCTGTTGAAGGTAACGGCGGAAGGCCTTATGAGTTCGGGGATGTAGTCATTCCGTATCCTCTGCGTATTGTAGGTTGTGGTTCTCAAGGTATCAACGTTACCAAGGGAACAGTCCTCAAGCGTTCTGCGGGTGCATCCTTCATGTTCCACTTCACGGGCGAGGGACAAGCTCAGCGTCCTATGGGCGGTGGGTTGTTTAACATCAA…
	End_P7P8_KP32	KP32 bp 37774-37968 (after gp38)	AGAGGTCTCGGTAATATGTTGTCCCTAGACTTCAATAACGAAGTTATCAAGGCGGCTCCCATTGCGGGTGTCGCTGGGGCCGATGGTGTAGCGAGGCTCTTCTGGGGCCTCTCACTCAACGAGTGGTTCTACGTCGCGGCAATCGCCTACACAGTGGTTCAGATTGGTGCCAAGGTAGTCGATAAAATCATTGACTGGAAGAAAGAGACCAAG
KP32_gp38ΔCBM_LEC	Start_P1P2_KP32	KP32 bp 33238-33422 (before gp37)	AGAGGTCTCTGACTGGCCTGATGAACTCCACAAAGGAGCTTGTGCCAAACGACCCGCTTACCCAACAGCTAATCATGAAAATCTATGAAGCTAATGGTGTCACCATAAAGCAGCAGCCTAGACCCAACTAATTAGGGCACACTATAGGGAGGCCGACTGGTTTCCCTCCTATTCAACTTAAGGAGGTCACCATGGAGACCAAG
	RBP_P2P5_2	KP32gp37AE_2/869	AGAGGTCTCACCATGGACCAAGATATTAAAACAATCATTCAGTACCCAACAGGAGCCACTGAGTTTGACATCCCGTTTGACTACCTGTCCCGCAAGTTTGTCCGCGTGTCTCTGGTATCGGACGACAACCGCCGACTCTTGCGCAACATCACGGAGTACCGTTACGTGTCGAAGACTCGCGTTAAGATTCTGGTGGACACCACTGGGTTCGACCGAGTTGAAATCCGACGGTTCACCTCAGCGTCTGAACGTGTTGTGGACTTCAGTGATGGCTCTGTGCTCCGCGCTAACGACCTAAACGTGTCCCAGCTACAGTCTTCACATATTGCCGAAGAGGCCCGTGACAGTGCGCTTCTGGCCATGCCTGAGGATGATGCTGGTAACCTCGACGCGAGAAAC…
	RBP_P5P7_5	KP32gp38CPEnzLin_1/379	AGAGGTCTCGGAGAACCTCATGTTAGACAATTTCAATCAGCCGAAAGGCTCAACCATTGGTGTGCTCAAGGATGGGCGCACTATCCAAGAGGCATTCGACTCATTACCGCGCCTTGAGTCCTTCTCTGGGTCCACGGCAACCGACAAGCTACGCGCAGCCATCACCTTAGGTGTATCTGAGGTCGCCATCGGTCCTGTTGAAGGTAACGGCGGAAGGCCTTATGAGTTCGGGGATGTAGTCATTCCGTATCCTCTGCGTATTGTAGGTTGTGGTTCTCAAGGTATCAACGTTACCAAGGGAACAGTCCTCAAGCGTTCTGCGGGTGCATCCTTCATGTTCCACTTCACGGGCGAGGGACAAGCTCAGCGTCCTATGGGCGGTGGGTTGTTTAACATCAA…
	End_P7P8_KP32	KP32 bp 37774-37968 (after gp38)	AGAGGTCTCGGTAATATGTTGTCCCTAGACTTCAATAACGAAGTTATCAAGGCGGCTCCCATTGCGGGTGTCGCTGGGGCCGATGGTGTAGCGAGGCTCTTCTGGGGCCTCTCACTCAACGAGTGGTTCTACGTCGCGGCAATCGCCTACACAGTGGTTCAGATTGGTGCCAAGGTAGTCGATAAAATCATTGACTGGAAGAAAGAGACCAAG
KP32_gp38ΔLIN_CBM_LEC	Start_P1P2_KP32	KP32 bp 33238-33422 (before gp37)	AGAGGTCTCTGACTGGCCTGATGAACTCCACAAAGGAGCTTGTGCCAAACGACCCGCTTACCCAACAGCTAATCATGAAAATCTATGAAGCTAATGGTGTCACCATAAAGCAGCAGCCTAGACCCAACTAATTAGGGCACACTATAGGGAGGCCGACTGGTTTCCCTCCTATTCAACTTAAGGAGGTCACCATGGAGACCAAG
	RBP_P2P5_2	KP32gp37AE_2/869	AGAGGTCTCACCATGGACCAAGATATTAAAACAATCATTCAGTACCCAACAGGAGCCACTGAGTTTGACATCCCGTTTGACTACCTGTCCCGCAAGTTTGTCCGCGTGTCTCTGGTATCGGACGACAACCGCCGACTCTTGCGCAACATCACGGAGTACCGTTACGTGTCGAAGACTCGCGTTAAGATTCTGGTGGACACCACTGGGTTCGACCGAGTTGAAATCCGACGGTTCACCTCAGCGTCTGAACGTGTTGTGGACTTCAGTGATGGCTCTGTGCTCCGCGCTAACGACCTAAACGTGTCCCAGCTACAGTCTTCACATATTGCCGAAGAGGCCCGTGACAGTGCGCTTCTGGCCATGCCTGAGGATGATGCTGGTAACCTCGACGCGAGAAAC…
	RBP_P5P7_6	KP32gp38CPEnz_1/360	AGAGGTCTCGGAGAACCTCATGTTAGACAATTTCAATCAGCCGAAAGGCTCAACCATTGGTGTGCTCAAGGATGGGCGCACTATCCAAGAGGCATTCGACTCATTACCGCGCCTTGAGTCCTTCTCTGGGTCCACGGCAACCGACAAGCTACGCGCAGCCATCACCTTAGGTGTATCTGAGGTCGCCATCGGTCCTGTTGAAGGTAACGGCGGAAGGCCTTATGAGTTCGGGGATGTAGTCATTCCGTATCCTCTGCGTATTGTAGGTTGTGGTTCTCAAGGTATCAACGTTACCAAGGGAACAGTCCTCAAGCGTTCTGCGGGTGCATCCTTCATGTTCCACTTCACGGGCGAGGGACAAGCTCAGCGTCCTATGGGCGGTGGGTTGTTTAACATCAA…
	End_P7P8_KP32	KP32 bp 37774-37968 (after gp38)	AGAGGTCTCGGTAATATGTTGTCCCTAGACTTCAATAACGAAGTTATCAAGGCGGCTCCCATTGCGGGTGTCGCTGGGGCCGATGGTGTAGCGAGGCTCTTCTGGGGCCTCTCACTCAACGAGTGGTTCTACGTCGCGGCAATCGCCTACACAGTGGTTCAGATTGGTGCCAAGGTAGTCGATAAAATCATTGACTGGAAGAAAGAGACCAAG
KP32_gp38ΔCBM	Start_P1P2_KP32	KP32 bp 33238-33422 (before gp37)	AGAGGTCTCTGACTGGCCTGATGAACTCCACAAAGGAGCTTGTGCCAAACGACCCGCTTACCCAACAGCTAATCATGAAAATCTATGAAGCTAATGGTGTCACCATAAAGCAGCAGCCTAGACCCAACTAATTAGGGCACACTATAGGGAGGCCGACTGGTTTCCCTCCTATTCAACTTAAGGAGGTCACCATGGAGACCAAG
	RBP_P2P5_2	KP32gp37AE_2/869	AGAGGTCTCACCATGGACCAAGATATTAAAACAATCATTCAGTACCCAACAGGAGCCACTGAGTTTGACATCCCGTTTGACTACCTGTCCCGCAAGTTTGTCCGCGTGTCTCTGGTATCGGACGACAACCGCCGACTCTTGCGCAACATCACGGAGTACCGTTACGTGTCGAAGACTCGCGTTAAGATTCTGGTGGACACCACTGGGTTCGACCGAGTTGAAATCCGACGGTTCACCTCAGCGTCTGAACGTGTTGTGGACTTCAGTGATGGCTCTGTGCTCCGCGCTAACGACCTAAACGTGTCCCAGCTACAGTCTTCACATATTGCCGAAGAGGCCCGTGACAGTGCGCTTCTGGCCATGCCTGAGGATGATGCTGGTAACCTCGACGCGAGAAAC…
	RBP_P5P9_1	KP32gp38CPEnzLin_1/379	AGAGGTCTCGGAGAACCTCATGTTAGACAATTTCAATCAGCCGAAAGGCTCAACCATTGGTGTGCTCAAGGATGGGCGCACTATCCAAGAGGCATTCGACTCATTACCGCGCCTTGAGTCCTTCTCTGGGTCCACGGCAACCGACAAGCTACGCGCAGCCATCACCTTAGGTGTATCTGAGGTCGCCATCGGTCCTGTTGAAGGTAACGGCGGAAGGCCTTATGAGTTCGGGGATGTAGTCATTCCGTATCCTCTGCGTATTGTAGGTTGTGGTTCTCAAGGTATCAACGTTACCAAGGGAACAGTCCTCAAGCGTTCTGCGGGTGCATCCTTCATGTTCCACTTCACGGGCGAGGGACAAGCTCAGCGTCCTATGGGCGGTGGGTTGTTTAACATCAA…
	LEC_P9P7_1	KP32gp38 LEC_488/577	AGAGGTCTCGGTAGTGATTATATTGACTGGGACTTCGCAATAGCCCCCGGTACACTAGCTGCTGGTGCCAAGTATACAACACCTAACCAGTCGTACCTAGATGTTGCTGGGATGCGCGTTCAGGCCGTTAGTATTCCAATGTTCGACGGACCAACAACAGGGTTGCAGGTCTGGGTTGAAGCAACCAGCGCCAACGGTTCGTTTGTTGTTGTCATGAAGAACGACACAGGGTCTGAGCTGGTGACCACAGTAACACGATGCCGAGTAAGGGCATTCGTATCATAAGGAGGTAATGAGACCAAG
	End_P7P8_KP32	KP32 bp 37774-37968 (after gp38)	AGAGGTCTCGGTAATATGTTGTCCCTAGACTTCAATAACGAAGTTATCAAGGCGGCTCCCATTGCGGGTGTCGCTGGGGCCGATGGTGTAGCGAGGCTCTTCTGGGGCCTCTCACTCAACGAGTGGTTCTACGTCGCGGCAATCGCCTACACAGTGGTTCAGATTGGTGCCAAGGTAGTCGATAAAATCATTGACTGGAAGAAAGAGACCAAG
KP32_gp38ΔLIN_CBM	Start_P1P2_KP32	KP32 bp 33238-33422 (before gp37)	AGAGGTCTCTGACTGGCCTGATGAACTCCACAAAGGAGCTTGTGCCAAACGACCCGCTTACCCAACAGCTAATCATGAAAATCTATGAAGCTAATGGTGTCACCATAAAGCAGCAGCCTAGACCCAACTAATTAGGGCACACTATAGGGAGGCCGACTGGTTTCCCTCCTATTCAACTTAAGGAGGTCACCATGGAGACCAAG
	RBP_P2P5_2	KP32gp37AE_2/869	AGAGGTCTCACCATGGACCAAGATATTAAAACAATCATTCAGTACCCAACAGGAGCCACTGAGTTTGACATCCCGTTTGACTACCTGTCCCGCAAGTTTGTCCGCGTGTCTCTGGTATCGGACGACAACCGCCGACTCTTGCGCAACATCACGGAGTACCGTTACGTGTCGAAGACTCGCGTTAAGATTCTGGTGGACACCACTGGGTTCGACCGAGTTGAAATCCGACGGTTCACCTCAGCGTCTGAACGTGTTGTGGACTTCAGTGATGGCTCTGTGCTCCGCGCTAACGACCTAAACGTGTCCCAGCTACAGTCTTCACATATTGCCGAAGAGGCCCGTGACAGTGCGCTTCTGGCCATGCCTGAGGATGATGCTGGTAACCTCGACGCGAGAAAC…
	RBP_P5P9_2	KP32gp38CPEnz_1/360	AGAGGTCTCGGAGAACCTCATGTTAGACAATTTCAATCAGCCGAAAGGCTCAACCATTGGTGTGCTCAAGGATGGGCGCACTATCCAAGAGGCATTCGACTCATTACCGCGCCTTGAGTCCTTCTCTGGGTCCACGGCAACCGACAAGCTACGCGCAGCCATCACCTTAGGTGTATCTGAGGTCGCCATCGGTCCTGTTGAAGGTAACGGCGGAAGGCCTTATGAGTTCGGGGATGTAGTCATTCCGTATCCTCTGCGTATTGTAGGTTGTGGTTCTCAAGGTATCAACGTTACCAAGGGAACAGTCCTCAAGCGTTCTGCGGGTGCATCCTTCATGTTCCACTTCACGGGCGAGGGACAAGCTCAGCGTCCTATGGGCGGTGGGTTGTTTAACATCAA…
	LEC_P9P7_1	KP32gp38 LEC_488/577	AGAGGTCTCGGTAGTGATTATATTGACTGGGACTTCGCAATAGCCCCCGGTACACTAGCTGCTGGTGCCAAGTATACAACACCTAACCAGTCGTACCTAGATGTTGCTGGGATGCGCGTTCAGGCCGTTAGTATTCCAATGTTCGACGGACCAACAACAGGGTTGCAGGTCTGGGTTGAAGCAACCAGCGCCAACGGTTCGTTTGTTGTTGTCATGAAGAACGACACAGGGTCTGAGCTGGTGACCACAGTAACACGATGCCGAGTAAGGGCATTCGTATCATAAGGAGGTAATGAGACCAAG
	End_P7P8_KP32	KP32 bp 37774-37968 (after gp38)	AGAGGTCTCGGTAATATGTTGTCCCTAGACTTCAATAACGAAGTTATCAAGGCGGCTCCCATTGCGGGTGTCGCTGGGGCCGATGGTGTAGCGAGGCTCTTCTGGGGCCTCTCACTCAACGAGTGGTTCTACGTCGCGGCAATCGCCTACACAGTGGTTCAGATTGGTGCCAAGGTAGTCGATAAAATCATTGACTGGAAGAAAGAGACCAAG
KP32_Δgp38	Start_P1P2_KP32	KP32 bp 33238-33422 (before gp37)	AGAGGTCTCTGACTGGCCTGATGAACTCCACAAAGGAGCTTGTGCCAAACGACCCGCTTACCCAACAGCTAATCATGAAAATCTATGAAGCTAATGGTGTCACCATAAAGCAGCAGCCTAGACCCAACTAATTAGGGCACACTATAGGGAGGCCGACTGGTTTCCCTCCTATTCAACTTAAGGAGGTCACCATGGAGACCAAG
	RBP_P2P7_1	KP32gp37whole_1/870	AGAGGTCTCACCATGGACCAAGATATTAAAACAATCATTCAGTACCCAACAGGAGCCACTGAGTTTGACATCCCGTTTGACTACCTGTCCCGCAAGTTTGTCCGCGTGTCTCTGGTATCGGACGACAACCGCCGACTCTTGCGCAACATCACGGAGTACCGTTACGTGTCGAAGACTCGCGTTAAGATTCTGGTGGACACCACTGGGTTCGACCGAGTTGAAATCCGACGGTTCACCTCAGCGTCTGAACGTGTTGTGGACTTCAGTGATGGCTCTGTGCTCCGCGCTAACGACCTAAACGTGTCCCAGCTACAGTCTTCACATATTGCCGAAGAGGCCCGTGACAGTGCGCTTCTGGCCATGCCTGAGGATGATGCTGGTAACCTCGACGCGAGAAAC…
	End_P7P8_KP32	KP32 bp 37774-37968 (after gp38)	AGAGGTCTCGGTAATATGTTGTCCCTAGACTTCAATAACGAAGTTATCAAGGCGGCTCCCATTGCGGGTGTCGCTGGGGCCGATGGTGTAGCGAGGCTCTTCTGGGGCCTCTCACTCAACGAGTGGTTCTACGTCGCGGCAATCGCCTACACAGTGGTTCAGATTGGTGCCAAGGTAGTCGATAAAATCATTGACTGGAAGAAAGAGACCAAG

[truncated: 2 more sheets: T S12, T S13]
